# Supplementary material
Source: PubMed Central journal article supplement (PMC6997731)
Supplement: AEM.02395-19-s0001.pdf [file AEM.02395-19-s0001.pdf]

## Supplementary Tables

**Tab S1. Gene enrichment analyses performed for each *Pseudovibrio* genome and for specific subsets of genes.**

| Strain                       | COG ID  | COG annotation                                                                               | P-value adjusted | Q-value  |
|------------------------------|---------|----------------------------------------------------------------------------------------------|------------------|----------|
| JCM12308                     | COG3209 | Uncharacterized conserved protein RhaS, contains 28 RHS repeats                              | 5,26E-04         | 5,26E-04 |
| NCIMB14279                   | COG1835 | Peptidoglycan/LPS O-acetylase OafA/YrhL, contains acyltransferase and SGNH-hydrolase domains | 2,87E-02         | 2,87E-02 |
| P8H04                        | COG2376 | Dihydroxyacetone kinase                                                                      | 1,54E-02         | 1,54E-02 |
| PHSC04                       | COG3328 | Transposase (or an inactivated derivative)                                                   | 5,82E-29         | 5,82E-29 |
| PHSC04                       | COG3436 | Transposase                                                                                  | 3,91E-27         | 3,91E-27 |
| PHSC04                       | COG4584 | Transposase                                                                                  | 5,08E-22         | 5,08E-22 |
| PHSC04                       | COG2801 | Transposase InsO and inactivated derivatives                                                 | 1,98E-15         | 1,98E-15 |
| PHSC04                       | COG3344 | Retron-type reverse transcriptase                                                            | 4,95E-15         | 4,95E-15 |
| PHSC04                       | COG1961 | Site-specific DNA recombinase related to the DNA invertase Pin                               | 2,17E-06         | 2,17E-06 |
| PHSC04                       | COG2826 | Transposase and inactivated derivatives, IS30 family                                         | 3,37E-04         | 3,37E-04 |
| PHSC04                       | COG2963 | Transposase and inactivated derivatives                                                      | 1,76E-03         | 1,76E-03 |
| PHSC04                       | COG3316 | Transposase (or an inactivated derivative)                                                   | 2,64E-03         | 2,64E-03 |
| PHSC04                       | COG1020 | Non-ribosomal peptide synthetase component F                                                 | 2,05E-02         | 2,05E-02 |
| <b>Missing in Psty/Phong</b> |         |                                                                                              |                  |          |
|                              | COG ID  | COG annotation                                                                               | P-value adjusted | Q-value  |
|                              | COG0477 | MFS family permease                                                                          | 1,06E-03         | 8,08E-04 |
|                              | COG1028 | NAD(P)-dependent dehydrogenase, short-chain alcohol dehydrogenase family                     | 3,15E-03         | 2,40E-03 |
|                              | COG1960 | Acyl-CoA dehydrogenase related to the alkylation response protein AidB                       | 4,28E-03         | 3,27E-03 |
|                              | COG1309 | DNA-binding transcriptional regulator, AcrR family                                           | 4,28E-03         | 3,27E-03 |
|                              | COG1024 | Enoyl-CoA hydratase/carnithine racemase                                                      | 9,65E-03         | 7,37E-03 |
|                              | COG1018 | Ferredoxin-NADP reductase                                                                    | 1,11E-02         | 8,46E-03 |
|                              | COG3791 | Uncharacterized conserved protein                                                            | 1,53E-02         | 1,17E-02 |
|                              | COG1670 | Protein N-acetyltransferase, RimJ/RimL family                                                | 2,57E-02         | 1,96E-02 |

|                                          |                |                                                                                      |                         |                |
|------------------------------------------|----------------|--------------------------------------------------------------------------------------|-------------------------|----------------|
|                                          | COG0840        | Methyl-accepting chemotaxis protein                                                  | 3,07E-02                | 2,34E-02       |
| <b>Unique in <i>P. stylochi</i></b>      |                |                                                                                      |                         |                |
|                                          | <b>COG ID</b>  | <b>COG annotation</b>                                                                | <b>P-value adjusted</b> | <b>Q-value</b> |
|                                          | COG0840        | Methyl-accepting chemotaxis protein                                                  | 1,88E-04                | 1,68E-04       |
|                                          | COG0642        | Signal transduction histidine kinase                                                 | 2,29E-02                | 2,04E-02       |
|                                          | COG1807        | 4-amino-4-deoxy-L-arabinose transferase or related glycosyltransferase of PMT family | 2,29E-02                | 2,04E-02       |
|                                          | COG2186        | DNA-binding transcriptional regulator, FadR family                                   | 2,43E-02                | 2,17E-02       |
| <b>Unique in <i>P. hongkongensis</i></b> |                |                                                                                      |                         |                |
|                                          | <b>COG ID</b>  | <b>COG annotation</b>                                                                | <b>P-value adjusted</b> | <b>Q-value</b> |
|                                          | COG0457        | Tetratricopeptide (TPR) repeat                                                       | 2,71E-03                | 2,48E-03       |
|                                          | COG0840        | Methyl-accepting chemotaxis protein                                                  | 2,71E-03                | 2,48E-03       |
| <b>Unique in PHSC04</b>                  |                |                                                                                      |                         |                |
|                                          | <b>COG ID</b>  | <b>COG annotation</b>                                                                | <b>P-value adjusted</b> | <b>Q-value</b> |
|                                          | COG3316        | Transposase (or an inactivated derivative)                                           | 9,14E-03                | 9,00E-03       |
|                                          | COG2801        | Transposase InsO and inactivated derivatives                                         | 9,14E-03                | 9,00E-03       |
| <b>Strain</b>                            | <b>KEGG ID</b> | <b>KEGG annotation</b>                                                               | <b>P-value adjusted</b> | <b>Q-value</b> |
| P3C10                                    | K06871         | uncharacterized protein                                                              | 1,30E-03                | 1,30E-03       |
| DSM24994                                 | K07498         | putative transposase                                                                 | 7,74E-06                | 7,74E-06       |
| P8H04                                    | K07498         | putative transposase                                                                 | 2,11E-04                | 2,11E-04       |
| PHSC04                                   | K07484         | transposase                                                                          | 2,63E-61                | 2,63E-61       |
| PHSC04                                   | K07483         | transposase                                                                          | 8,74E-22                | 8,74E-22       |
| PHSC04                                   | K07498         | putative transposase                                                                 | 1,44E-15                | 1,44E-15       |
| PHSC04                                   | K00986         | RNA-directed DNA polymerase                                                          | 7,86E-14                | 7,86E-14       |
| PHSC04                                   | K06223         | DNA adenine methylase                                                                | 1,34E-05                | 1,34E-05       |
| PHSC04                                   | K07494         | putative transposase                                                                 | 3,07E-02                | 3,07E-02       |

|                                          |                |                                                                                                     |                         |                |
|------------------------------------------|----------------|-----------------------------------------------------------------------------------------------------|-------------------------|----------------|
| Phong                                    | K07498         | putative transposase                                                                                | 3,34E-02                | 3,34E-02       |
| <b>Missing in Psty/Phong</b>             |                |                                                                                                     |                         |                |
|                                          | <b>KEGG ID</b> | <b>KEGG annotation</b>                                                                              | <b>P-value adjusted</b> | <b>Q-value</b> |
|                                          | K00249         | acyl-CoA dehydrogenase                                                                              | 4,49E-02                | 4,48E-02       |
| <b>Unique in <i>P. stylochi</i></b>      |                |                                                                                                     |                         |                |
|                                          | <b>KEGG ID</b> | <b>KEGG annotation</b>                                                                              | <b>P-value adjusted</b> | <b>Q-value</b> |
|                                          | K03406         | methyl-accepting chemotaxis protein                                                                 | 7,83E-07                | 7,57E-07       |
|                                          | K05799         | GntR family transcriptional regulator, transcriptional repressor for pyruvate dehydrogenase complex | 4,34E-02                | 4,19E-02       |
| <b>Unique in <i>P. hongkongensis</i></b> |                |                                                                                                     |                         |                |
|                                          | <b>KEGG ID</b> | <b>KEGG annotation</b>                                                                              | <b>P-value adjusted</b> | <b>Q-value</b> |
|                                          | K03406         | methyl-accepting chemotaxis protein                                                                 | 7,40E-03                | 6,98E-03       |
|                                          | K02015         | iron complex transport system permease protein                                                      | 7,40E-03                | 6,98E-03       |
| <b>Unique in PHSC04</b>                  |                |                                                                                                     |                         |                |
|                                          | <b>KEGG ID</b> | <b>KEGG annotation</b>                                                                              | <b>P-value adjusted</b> | <b>Q-value</b> |
|                                          | K07498         | putative transposase                                                                                | 4,81E-10                | 3,99E-10       |
|                                          | K07484         | transposase                                                                                         | 6,09E-05                | 5,06E-05       |
|                                          | K07497         | putative transposase                                                                                | 6,69E-05                | 5,56E-05       |
|                                          | K06223         | DNA adenine methylase                                                                               | 6,69E-05                | 5,56E-05       |
|                                          | K07482         | transposase, IS30 family                                                                            | 5,01E-03                | 4,17E-03       |
|                                          | K07483         | transposase                                                                                         | 1,23E-02                | 1,02E-02       |
|                                          | K07265         | capsular polysaccharide export protein                                                              | 1,48E-02                | 1,23E-02       |

**Tab S2. Number of the genes in clade A strains, missing in clade B strains that have been identified as horizontal gene transfer candidates (HGT)\* or on mobile genetic elements (MGE).** Columns show genes missing from clade B strains but present in all clade A strains and those present in 95% of clade A strains. Percentage of gene counts is shown in brackets.

|                 | clade A-only genes | 95% clade A-only genes |
|-----------------|--------------------|------------------------|
| Total           | 136,297            | 59,486                 |
| HGT candidates* | 3,095 (2.3%)       | 887 (1.5%)             |
| Located on MGEs | 17,253 (12.7%)     | 1,662 (2.8%)           |

\* identified by their di-nucleotide signatures

**Tab S3. KEGG modules identified in the genes missing in strains belonging to clade B but detected in  $\geq 95\%$  of the remaining *Pseudovibrio* strains.**

### Module Reconstruction Result

[Show all objects](#)

Pathway module

#### Carbohydrate metabolism

Central carbohydrate metabolism

M00307 Pyruvate oxidation, pyruvate => acetyl-CoA [PATH:map00010 map00020 map00620 map01200 map01100] (1) (1 block missing)

M00010 Citrate cycle, first carbon oxidation, oxaloacetate => 2-oxoglutarate [PATH:map00020 map01200 map01210 map01230 map01100] (2) (1 block missing)

Other carbohydrate metabolism

M00741 Propanoyl-CoA metabolism, propanoyl-CoA => succinyl-CoA [PATH:map00280 map00630 map00640 map01200 map01100] (1) (2 blocks missing)

Energy metabolism

Methane metabolism

M00345 Formaldehyde assimilation, ribulose monophosphate pathway [PATH:map00030 map00680 map01200 map01230 map01120] (1) (2 blocks missing)

M00378 F420 biosynthesis [PATH:map00680 map01120] (5) (complete)

Nitrogen metabolism

M00530 Dissimilatory nitrate reduction, nitrate => ammonia [PATH:map00910 map01120] (3) (1 block missing)

M00529 Denitrification, nitrate => nitrogen [PATH:map00910 map01120] (4) (2 blocks missing)

M00804 Complete nitrification, comammox, ammonia => nitrite => nitrate [PATH:map00910 map01120] (2) (2 blocks missing)

Sulfur metabolism

M00595 Thiosulfate oxidation by SOX complex, thiosulfate => sulfate [PATH:map00920 map01100 map01120] (7) (complete)

## Lipid metabolism

### Fatty acid biosynthesis and degradation

M00082 Fatty acid biosynthesis, initiation [PATH:map00061 map01212 map01100] (1) (2 blocks missing)

M00083 Fatty acid biosynthesis, elongation [PATH:map00061 map01212 map01100] (3) (1 block missing)

M00086 beta-Oxidation, acyl-CoA synthesis [PATH:map00061 map00071 map01212 map01100] (1) (complete)

M00087 beta-Oxidation [PATH:map00071 map01212 map01100] (7) (1 block missing)

### Lipid metabolism

M00093 Phosphatidylethanolamine (PE) biosynthesis, PA => PS => PE [PATH:map00564 map01100] (1) (2 blocks missing)

### Nucleotide metabolism

#### Pyrimidine metabolism

M00046 Pyrimidine degradation, uracil => beta-alanine, thymine => 3-aminoisobutanoate [PATH:map00240 map01100] (2) (1 block missing)

#### Amino acid metabolism

##### Serine and threonine metabolism

M00555 Betaine biosynthesis, choline => betaine [PATH:map00260 map01100] (1) (1 block missing)

##### Arginine and proline metabolism

M00844 Arginine biosynthesis, ornithine => arginine [PATH:map00220 map01230 map01100] (2) (1 block missing)

##### Polyamine biosynthesis

M00135 GABA biosynthesis, eukaryotes, putrescine => GABA [PATH:map00330 map01100] (1) (2 blocks missing)

##### Histidine metabolism

M00045 Histidine degradation, histidine => N-formiminoglutamate => glutamate [PATH:map00340 map01100] (5) (complete)

##### Aromatic amino acid metabolism

M00024 Phenylalanine biosynthesis, chorismate => phenylalanine [PATH:map00400 map01230 map01100 map01110] (1) (2 blocks missing)

##### Other amino acid metabolism

M00027 GABA (gamma-Aminobutyrate) shunt [PATH:map00250 map00650 map01100] (2) (1 block missing)

### Metabolism of cofactors and vitamins

#### Cofactor and vitamin metabolism

M00123 Biotin biosynthesis, pimeloyl-ACP/CoA => biotin [PATH:map00780 map01100] (4) (complete)

M00573 Biotin biosynthesis, BioI pathway, long-chain-acyl-ACP => pimeloyl-ACP => biotin [PATH:map00780 map01100] (4) (1 block missing)

M00577 Biotin biosynthesis, BioW pathway, pimelate => pimeloyl-CoA => biotin [PATH:map00780 map01100] (4) (1 block missing)

M00842 Tetrahydrobiopterin biosynthesis, GTP => BH4 [PATH:map00790 map01100] (1) (2 blocks missing)

M00843 L-threo-Tetrahydrobiopterin biosynthesis, GTP => L-threo-BH4 [PATH:map00790 map01100] (1) (2 blocks missing)

M00140 C1-unit interconversion, prokaryotes [PATH:map00670 map01100] (1) (2 blocks missing)

## Structural complex

### Energy metabolism

#### ATP synthesis

M00144 NADH:quinone oxidoreductase, prokaryotes [PATH:map00190] (1) (1 block missing)

M00417 Cytochrome o ubiquinol oxidase [PATH:map00190] (4) (complete)

#### Genetic information processing

##### Ribosome

M00178 Ribosome, bacteria [PATH:map03010] [BR:ko03011] (1) (1 block missing)

Environmental information processing

Mineral and organic ion transport system

M00189 Molybdate transport system [PATH:map02010] [BR:ko02000] (3) (complete)

M00435 Taurine transport system [PATH:map02010] [BR:ko02000] (3) (complete)

M00190 Iron(III) transport system [PATH:map02010] [BR:ko02000] (6) (complete)

M00191 Thiamine transport system [PATH:map02010] [BR:ko02000] (2) (1 block missing)

M00299 Spermidine/putrescine transport system [PATH:map02010] [BR:ko02000] (4) (complete)

M00300 Putrescine transport system [PATH:map02010] [BR:ko02000] (4) (complete)

Saccharide, polyol, and lipid transport system

M00194 Maltose/maltodextrin transport system [PATH:map02010] [BR:ko02000] (2) (1 block missing)

M00196 Multiple sugar transport system [PATH:map02010] [BR:ko02000] (2) (1 block missing)

M00201 alpha-Glucoside transport system [PATH:map02010] [BR:ko02000] (2) (complete)

M00605 Glucose/mannose transport system [PATH:map02010] [BR:ko02000] (5) (complete)

M00206 Cellobiose transport system [PATH:map02010] [BR:ko02000] (2) (1 block missing)

M00606 N,N'-Diacetylchitobiose transport system [PATH:map02010] [BR:ko02000] (2) (1 block missing)

M00212 Ribose transport system [PATH:map02010] [BR:ko02000] (2) (1 block missing)

M00197 Putative fructooligosaccharide transport system [BR:ko02000] (2) (1 block missing)

M00607 Glycerol transport system [PATH:map02010] [BR:ko02000] (5) (complete)

M00198 Putative sn-glycerol-phosphate transport system [PATH:map02010] [BR:ko02000] (4) (complete)

M00200 Putative sorbitol/mannitol transport system [PATH:map02010] [BR:ko02000] (2) (1 block missing)

M00602 Arabinosaccharide transport system [PATH:map02010] [BR:ko02000] (2) (1 block missing)

M00669 gamma-Hexachlorocyclohexane transport system [BR:ko02000] (1) (1 block missing)

M00210 Phospholipid transport system [PATH:map02010] [BR:ko02000] (1) (1 block missing)

M00670 Mce transport system [BR:ko02000] (1) (1 block missing)

M00491 arabinogalactan oligomer/maltooligosaccharide transport system [PATH:map02010] [BR:ko02000] (2) (1 block missing)

M00207 Putative multiple sugar transport system [BR:ko02000] (8) (complete)

M00221 Putative simple sugar transport system [BR:ko02000] (5) (complete)

M00211 Putative ABC transport system [BR:ko02000] (1) (1 block missing)

Phosphate and amino acid transport system

M00222 Phosphate transport system [PATH:map02010] [BR:ko02000] (1) (1 block missing)

M00237 Branched-chain amino acid transport system [PATH:map02010] [BR:ko02000] (13) (complete)

M00236 Putative polar amino acid transport system [BR:ko02000] (1) (1 block missing)

Peptide and nickel transport system

M00239 Peptides/nickel transport system [PATH:map02010] [BR:ko02000] (15) (complete)

Metallic cation, iron-siderophore and vitamin B12 transport system

M00240 Iron complex transport system [PATH:map02010] [BR:ko02000] (5) (complete)

M00242 Zinc transport system [PATH:map02010] [BR:ko02000] (1) (1 block missing)

M00581 Biotin transport system [PATH:map02010] [BR:ko02000] (1) (1 block missing)

M00582 Energy-coupling factor transport system [PATH:map02010] [BR:ko02000] (1) (1 block missing)

ABC-2 type and other transport systems

M00762 Copper-processing system [PATH:map02010] [BR:ko02000] (1) (1 block missing)

M00258 Putative ABC transport system [BR:ko02000] (2) (complete)

M00254 ABC-2 type transport system [BR:ko02000] (1) (1 block missing)

Bacterial secretion system

M00330 Adhesin protein transport system [BR:ko02044] (5) (complete)

M00429 Competence-related DNA transformation transporter [BR:ko02044] (1) (1 block missing)

## Functional set

### Environmental information processing

Two-component regulatory system

M00445 EnvZ-OmpR (osmotic stress response) two-component regulatory system [PATH:map02020]  
[BR:ko02022] (1) (1 block missing)

M00453 QseC-QseB (quorum sensing) two-component regulatory system [PATH:map02020]  
[BR:ko02022] (2) (complete)

M00504 DctB-DctD (C4-dicarboxylate transport) two-component regulatory system [PATH:map02020]  
[BR:ko02022] (1) (1 block missing)

M00517 RpfC-RpfG (cell-to-cell signaling) two-component regulatory system [PATH:map02020]  
[BR:ko02022] (1) (1 block missing)

Drug efflux transporter/pump

M00647 Multidrug resistance, efflux pump AcrAB-TolC/SmeDEF (2) (2 blocks missing)

M00699 Multidrug resistance, efflux pump AmeABC (2) (2 blocks missing)

Drug resistance

M00742 Aminoglycoside resistance, protease FtsH (1) (2 blocks missing)

M00743 Aminoglycoside resistance, protease HtpX (1) (2 blocks missing)

M00729 Fluoroquinolone resistance, gyrase-protecting protein Qnr (1) (2 blocks missing)

Cell signaling

M00695 cAMP signaling [PATH:map04024] (4) (2 blocks missing)

## Signature module

### Gene set

Drug resistance

M00718 Multidrug resistance, efflux pump MexAB-OprM (2) (2 blocks missing)

Module set

Metabolic capacity

M00615 Nitrate assimilation (2) (1 block missing)

**Tab S4. Environmental distribution of the *Pseudovibrio* genus based on 16S rRNA gene amplicon datasets.** 16S rRNA sequences of 8 strains were queried against raw 16S rRNA gene amplicon data from 422,880 metagenomic samples as accessed by the IMNGS platform<sup>1</sup>. Samples with zero relative abundances for all strains as well as samples with only 1 sequence count over all strains were excluded from the table. Colors correspond to isolation source.

| Run        | BioProject  | BioSample    | Isolation Source | Description                   | P4B07 | <i>P.denitri-<br/>ficans</i> | <i>P.axinellae</i> | <i>P.ascidia-<br/>ceicola</i> | <i>P.japon-<br/>icus</i> | <i>P.hongkong-<br/>ensis</i> | <i>P.stylochi</i> |
|------------|-------------|--------------|------------------|-------------------------------|-------|------------------------------|--------------------|-------------------------------|--------------------------|------------------------------|-------------------|
| SRR2040958 | PRJNA284506 | SAMN03731496 | aquarium water   |                               | 0     | 0                            | 0                  | 0                             | 0                        | 0.19                         | 0.095             |
| SRR2040959 | PRJNA284506 | SAMN03731497 | aquarium water   |                               | 0     | 0                            | 0                  | 0                             | 0                        | 0.218                        | 0.109             |
| SRR2041111 | PRJNA284506 | SAMN03731628 | aquarium water   |                               | 0     | 0                            | 0                  | 0                             | 0                        | 0.167                        | 0.083             |
| SRR2041124 | PRJNA284506 | SAMN03731640 | aquarium water   |                               | 0     | 1.485                        | 0                  | 0                             | 0                        | 0                            | 0                 |
| SRR2041127 | PRJNA284506 | SAMN03731643 | aquarium water   |                               | 0     | 0                            | 0                  | 0                             | 0                        | 0                            | 0.084             |
| SRR2041129 | PRJNA284506 | SAMN03731644 | aquarium water   |                               | 0     | 0.544                        | 0                  | 0                             | 0                        | 0                            | 0                 |
| SRR2041157 | PRJNA284506 | SAMN03731652 | aquarium water   |                               | 0     | 0.245                        | 0                  | 0                             | 0                        | 0                            | 0                 |
| SRR2041159 | PRJNA284506 | SAMN03731653 | aquarium water   |                               | 0     | 0.183                        | 0                  | 0                             | 0                        | 0.11                         | 0.055             |
| SRR2041161 | PRJNA284506 | SAMN03731654 | aquarium water   |                               | 0     | 0.302                        | 0                  | 0                             | 0                        | 0                            | 0                 |
| SRR584302  |             | SAMN01760520 | aquarium water   |                               | 0     | 0.053                        | 0                  | 0                             | 0                        | 0                            | 0                 |
| SRR584313  |             | SAMN01760531 | aquarium water   |                               | 0     | 0.051                        | 0                  | 0                             | 0                        | 0                            | 0                 |
| SRR584321  |             | SAMN01760539 | aquarium water   |                               | 0     | 0.047                        | 0                  | 0                             | 0                        | 0                            | 0                 |
| ERR951498  | PRJEB9766   | SAMEA3753223 | coral            | <i>Lophelia pertusa</i> mucus | 0.416 | 0                            | 0                  | 0.416                         | 0                        | 0                            | 0                 |
| SRR1791581 | PRJNA274309 | SAMN03329635 | coral            |                               | 0     | 0.164                        | 0                  | 0                             | 0                        | 0                            | 0                 |





|            |             |              |       |                        |       |       |   |       |       |       |       |
|------------|-------------|--------------|-------|------------------------|-------|-------|---|-------|-------|-------|-------|
| SRR3204409 | PRJNA313192 | SAMN04531901 | coral |                        | 0     | 0     | 0 | 0     | 0     | 0.168 | 0.084 |
| SRR3204411 | PRJNA313192 | SAMN04531911 | coral |                        | 0     | 1.056 | 0 | 0     | 0     | 0     | 0     |
| SRR3204412 | PRJNA313192 | SAMN04531912 | coral |                        | 0     | 0.068 | 0 | 0     | 0     | 0     | 0     |
| SRR3204414 | PRJNA313192 | SAMN04531914 | coral |                        | 0     | 0.125 | 0 | 0     | 0     | 0     | 0     |
| SRR3204415 | PRJNA313192 | SAMN04531915 | coral |                        | 0     | 0.009 | 0 | 0     | 0     | 0     | 0     |
| SRR3204416 | PRJNA313192 | SAMN04531916 | coral |                        | 0     | 0.449 | 0 | 0     | 0     | 0     | 0     |
| SRR3204419 | PRJNA313192 | SAMN04531919 | coral |                        | 0     | 0     | 0 | 0     | 0     | 0.144 | 0.072 |
| SRR3204432 | PRJNA313192 | SAMN04531930 | coral |                        | 0     | 0.109 | 0 | 0     | 0     | 0     | 0     |
| SRR3204434 | PRJNA313192 | SAMN04531932 | coral |                        | 0     | 1.264 | 0 | 0     | 0     | 0     | 0     |
| SRR3204454 | PRJNA313192 | SAMN04531950 | coral |                        | 0     | 0.486 | 0 | 0     | 0     | 0     | 0     |
| SRR3204455 | PRJNA313192 | SAMN04531951 | coral |                        | 0     | 0.579 | 0 | 0     | 0     | 0     | 0     |
| SRR3204456 | PRJNA313192 | SAMN04531952 | coral |                        | 0     | 0.014 | 0 | 0     | 0     | 0     | 0     |
| SRR3204473 | PRJNA313192 | SAMN04531968 | coral |                        | 0     | 0.162 | 0 | 0     | 0     | 0     | 0     |
| SRR3204476 | PRJNA313192 | SAMN04531970 | coral |                        | 0     | 0.163 | 0 | 0     | 0     | 0     | 0     |
| SRR3204477 | PRJNA313192 | SAMN04531971 | coral |                        | 0     | 0.907 | 0 | 0     | 0     | 0     | 0     |
| SRR3204478 | PRJNA313192 | SAMN04531972 | coral |                        | 0     | 0.681 | 0 | 0     | 0     | 0     | 0     |
| SRR4471363 | PRJNA350361 | SAMN05938545 | coral | seawater               | 0     | 0.049 | 0 | 0     | 0     | 0     | 0     |
| SRR4471383 | PRJNA350361 | SAMN05938552 | coral | seawater               | 0     | 9.292 | 0 | 0     | 0     | 0     | 0     |
| SRR4471384 | PRJNA350361 | SAMN05938559 | coral | seawater               | 0     | 0.032 | 0 | 0     | 0     | 0     | 0     |
| SRR4471385 | PRJNA350361 | SAMN05938555 | coral | seawater               | 0     | 0.023 | 0 | 0     | 0     | 0     | 0     |
| SRR5437923 | PRJNA382610 | SAMN06711101 | coral | <i>Agaricia undata</i> | 0     | 0.013 | 0 | 0     | 0     | 0     | 0     |
| SRR5437929 | PRJNA382610 | SAMN06711095 | coral | <i>Agaricia undata</i> | 0     | 0.022 | 0 | 0     | 0     | 0     | 0     |
| SRR5447849 | PRJNA382809 | SAMN06733055 | coral | seawater               | 0     | 0.018 | 0 | 0     | 0     | 0     | 0     |
| SRR5970173 | PRJNA393088 | SAMN07315126 | coral |                        | 0     | 0.428 | 0 | 0     | 0     | 0     | 0     |
| SRR7541461 | PRJNA481946 | SAMN09692599 | coral |                        | 0.028 | 0     | 0 | 0.028 | 0.028 | 0     | 0     |
| SRR7541462 | PRJNA481946 | SAMN09692600 | coral |                        | 0.024 | 0     | 0 | 0.024 | 0.024 | 0     | 0     |
| SRR7541483 | PRJNA481946 | SAMN09692584 | coral |                        | 0.068 | 0     | 0 | 0.068 | 0.068 | 0     | 0     |

|            |             |              |       |  |       |        |   |       |       |   |   |
|------------|-------------|--------------|-------|--|-------|--------|---|-------|-------|---|---|
| SRR7541488 | PRJNA481946 | SAMN09692587 | coral |  | 0.064 | 0      | 0 | 0.064 | 0.064 | 0 | 0 |
| SRR7541512 | PRJNA481946 | SAMN09692641 | coral |  | 0.038 | 0      | 0 | 0     | 0.038 | 0 | 0 |
| SRR7541529 | PRJNA481946 | SAMN09692624 | coral |  | 0.011 | 0      | 0 | 0     | 0     | 0 | 0 |
| SRR7541531 | PRJNA481946 | SAMN09692622 | coral |  | 0.011 | 0      | 0 | 0     | 0.011 | 0 | 0 |
| SRR7541534 | PRJNA481946 | SAMN09692629 | coral |  | 0.099 | 0      | 0 | 0.099 | 0.099 | 0 | 0 |
| SRR7541538 | PRJNA481946 | SAMN09692614 | coral |  | 0.034 | 0      | 0 | 0.034 | 0.034 | 0 | 0 |
| SRR7541542 | PRJNA481946 | SAMN09692618 | coral |  | 0.012 | 0      | 0 | 0.012 | 0.012 | 0 | 0 |
| SRR7541545 | PRJNA481946 | SAMN09692610 | coral |  | 0.005 | 0      | 0 | 0.005 | 0.005 | 0 | 0 |
| SRR7541548 | PRJNA481946 | SAMN09692605 | coral |  | 0     | 0.021  | 0 | 0     | 0     | 0 | 0 |
| SRR7541551 | PRJNA481946 | SAMN09692602 | coral |  | 0.028 | 0      | 0 | 0.028 | 0.028 | 0 | 0 |
| SRR7541553 | PRJNA481946 | SAMN09692604 | coral |  | 3.423 | 0      | 0 | 3.423 | 3.423 | 0 | 0 |
| SRR7598225 | PRJNA482722 | SAMN09711476 | coral |  | 0     | 2.288  | 0 | 0     | 0     | 0 | 0 |
| SRR7598226 | PRJNA482722 | SAMN09711432 | coral |  | 0     | 20.039 | 0 | 0     | 0     | 0 | 0 |
| SRR7598233 | PRJNA482722 | SAMN09711426 | coral |  | 0     | 10.31  | 0 | 0     | 0     | 0 | 0 |
| SRR7598235 | PRJNA482722 | SAMN09711424 | coral |  | 0     | 12.408 | 0 | 0     | 0     | 0 | 0 |
| SRR7598237 | PRJNA482722 | SAMN09711430 | coral |  | 0     | 13.875 | 0 | 0     | 0     | 0 | 0 |
| SRR7598239 | PRJNA482722 | SAMN09711428 | coral |  | 0     | 22.796 | 0 | 0     | 0     | 0 | 0 |
| SRR7598241 | PRJNA482722 | SAMN09711475 | coral |  | 0     | 1.156  | 0 | 0     | 0     | 0 | 0 |
| SRR7598247 | PRJNA482722 | SAMN09711444 | coral |  | 0     | 0.499  | 0 | 0     | 0     | 0 | 0 |
| SRR7598267 | PRJNA482722 | SAMN09711472 | coral |  | 0     | 6.865  | 0 | 0     | 0     | 0 | 0 |
| SRR7598268 | PRJNA482722 | SAMN09711474 | coral |  | 0     | 3.062  | 0 | 0     | 0     | 0 | 0 |
| SRR7598269 | PRJNA482722 | SAMN09711473 | coral |  | 0     | 12.404 | 0 | 0     | 0     | 0 | 0 |
| SRR7598270 | PRJNA482722 | SAMN09711478 | coral |  | 0     | 5.75   | 0 | 0     | 0     | 0 | 0 |
| SRR7598274 | PRJNA482722 | SAMN09711481 | coral |  | 0     | 3.807  | 0 | 0     | 0     | 0 | 0 |
| SRR7598276 | PRJNA482722 | SAMN09711477 | coral |  | 0     | 3.192  | 0 | 0     | 0     | 0 | 0 |
| SRR7598277 | PRJNA482722 | SAMN09711466 | coral |  | 0     | 0.079  | 0 | 0     | 0     | 0 | 0 |
| SRR7598279 | PRJNA482722 | SAMN09711434 | coral |  | 0     | 11.953 | 0 | 0     | 0     | 0 | 0 |

|            |             |              |             |                                                      |   |       |   |   |   |       |       |
|------------|-------------|--------------|-------------|------------------------------------------------------|---|-------|---|---|---|-------|-------|
| SRR8243359 | PRJNA506563 | SAMN10462717 | coral       |                                                      | 0 | 0.145 | 0 | 0 | 0 | 0     | 0     |
| SRR3708167 | PRJNA326427 | SAMN05277842 | echino-derm | sea urchin,<br><i>Lytechinus variegatus</i>          | 0 | 0     | 0 | 0 | 0 | 0.294 | 0.147 |
| SRR3708170 | PRJNA326427 | SAMN05277843 | echino-derm | sea urchin,<br><i>Lytechinus variegatus</i>          | 0 | 0     | 0 | 0 | 0 | 0.17  | 0.085 |
| SRR3708179 | PRJNA326427 | SAMN05277844 | echino-derm | sea urchin,<br><i>Lytechinus variegatus</i>          | 0 | 0     | 0 | 0 | 0 | 0.295 | 0.148 |
| SRR3708282 | PRJNA326427 | SAMN05277845 | echino-derm | sea urchin,<br><i>Lytechinus variegatus</i>          | 0 | 0     | 0 | 0 | 0 | 0.162 | 0.081 |
| SRR3708283 | PRJNA326427 | SAMN05277846 | echino-derm | sea urchin,<br><i>Lytechinus variegatus</i>          | 0 | 0     | 0 | 0 | 0 | 0.012 | 0.006 |
| SRR3708284 | PRJNA326427 | SAMN05277847 | echino-derm | sea urchin,<br><i>Lytechinus variegatus</i>          | 0 | 0     | 0 | 0 | 0 | 0.172 | 0.086 |
| SRR3708342 | PRJNA326427 | SAMN05277851 | echino-derm | sea urchin,<br><i>Lytechinus variegatus</i>          | 0 | 0     | 0 | 0 | 0 | 0     | 0.005 |
| SRR5280714 | PRJNA376395 | SAMN06435126 | echino-derm | sea urchin,<br><i>Lytechinus variegatus</i>          | 0 | 0     | 0 | 0 | 0 | 0     | 0.015 |
| SRR5280717 | PRJNA376395 | SAMN06435123 | echino-derm | sea urchin,<br><i>Lytechinus variegatus</i><br>feces | 0 | 0     | 0 | 0 | 0 | 0.369 | 0.185 |
| SRR5280718 | PRJNA376395 | SAMN06435122 | echino-derm | sea urchin,<br><i>Lytechinus variegatus</i><br>feces | 0 | 0     | 0 | 0 | 0 | 1.65  | 0.825 |
| SRR5280719 | PRJNA376395 | SAMN06435121 | echino-derm | sea urchin,<br><i>Lytechinus variegatus</i><br>feces | 0 | 0     | 0 | 0 | 0 | 0.916 | 0.458 |
| SRR5280720 | PRJNA376395 | SAMN06435120 | echino-derm | sea urchin,<br><i>Lytechinus</i>                     | 0 | 0     | 0 | 0 | 0 | 0.696 | 0.348 |

|            |             |              |             |                                                                |   |   |   |   |   |       |       |
|------------|-------------|--------------|-------------|----------------------------------------------------------------|---|---|---|---|---|-------|-------|
|            |             |              |             | <i>variegatus</i><br>feces                                     |   |   |   |   |   |       |       |
| SRR5280721 | PRJNA376395 | SAMN06435119 | echino-derm | sea urchin,<br><i>Lytechinus</i><br><i>variegatus</i><br>feces | 0 | 0 | 0 | 0 | 0 | 0.314 | 0.157 |
| SRR5280722 | PRJNA376395 | SAMN06435118 | echino-derm | sea urchin,<br><i>Lytechinus</i><br><i>variegatus</i><br>feces | 0 | 0 | 0 | 0 | 0 | 0.077 | 0.039 |
| SRR5280723 | PRJNA376395 | SAMN06435117 | echino-derm | sea urchin,<br><i>Lytechinus</i><br><i>variegatus</i><br>feces | 0 | 0 | 0 | 0 | 0 | 1.341 | 0.67  |
| SRR5280724 | PRJNA376395 | SAMN06435116 | echino-derm | sea urchin,<br><i>Lytechinus</i><br><i>variegatus</i><br>feces | 0 | 0 | 0 | 0 | 0 | 0.457 | 0.229 |
| SRR5280725 | PRJNA376395 | SAMN06435115 | echino-derm | sea urchin,<br><i>Lytechinus</i><br><i>variegatus</i><br>feces | 0 | 0 | 0 | 0 | 0 | 2.62  | 1.31  |
| SRR5280726 | PRJNA376395 | SAMN06435114 | echino-derm | sea urchin,<br><i>Lytechinus</i><br><i>variegatus</i><br>feces | 0 | 0 | 0 | 0 | 0 | 3.29  | 1.645 |
| SRR5280727 | PRJNA376395 | SAMN06435113 | echino-derm | sea urchin,<br><i>Lytechinus</i><br><i>variegatus</i><br>feces | 0 | 0 | 0 | 0 | 0 | 2.892 | 1.446 |
| SRR5280728 | PRJNA376395 | SAMN06435112 | echino-derm | sea urchin,<br><i>Lytechinus</i><br><i>variegatus</i>          | 0 | 0 | 0 | 0 | 0 | 0.198 | 0.099 |
| SRR5280734 | PRJNA376395 | SAMN06435106 | echino-derm | sea urchin,<br><i>Lytechinus</i><br><i>variegatus</i>          | 0 | 0 | 0 | 0 | 0 | 0.062 | 0.031 |
| SRR5280735 | PRJNA376395 | SAMN06435105 | echino-derm | sea urchin,<br><i>Lytechinus</i><br><i>variegatus</i>          | 0 | 0 | 0 | 0 | 0 | 0.636 | 0.318 |

|            |             |                |               |                                             |       |   |       |       |       |       |       |
|------------|-------------|----------------|---------------|---------------------------------------------|-------|---|-------|-------|-------|-------|-------|
| SRR5280736 | PRJNA376395 | SAMN06435104   | echino-derm   | sea urchin,<br><i>Lytechinus variegatus</i> | 0     | 0 | 0     | 0     | 0     | 0.031 | 0.016 |
| SRR5280737 | PRJNA376395 | SAMN06435103   | echino-derm   | sea urchin,<br><i>Lytechinus variegatus</i> | 0     | 0 | 0     | 0     | 0     | 0     | 0.003 |
| SRR5280738 | PRJNA376395 | SAMN06435102   | echino-derm   | sea urchin,<br><i>Lytechinus variegatus</i> | 0     | 0 | 0     | 0     | 0     | 0.693 | 0.347 |
| SRR5280739 | PRJNA376395 | SAMN06435101   | echino-derm   | sea urchin,<br><i>Lytechinus variegatus</i> | 0     | 0 | 0     | 0     | 0     | 0.208 | 0.104 |
| SRR5280740 | PRJNA376395 | SAMN06435100   | echino-derm   | sea urchin,<br><i>Lytechinus variegatus</i> | 0     | 0 | 0     | 0     | 0     | 0.166 | 0.083 |
| SRR5280741 | PRJNA376395 | SAMN06435099   | echino-derm   | sea urchin,<br><i>Lytechinus variegatus</i> | 0     | 0 | 0     | 0     | 0     | 0.204 | 0.102 |
| SRR5280742 | PRJNA376395 | SAMN06435098   | echino-derm   | sea urchin,<br><i>Lytechinus variegatus</i> | 0     | 0 | 0     | 0     | 0     | 1.495 | 0.748 |
| SRR5280749 | PRJNA376395 | SAMN06435091   | echino-derm   | sea urchin,<br><i>Lytechinus variegatus</i> | 0     | 0 | 0     | 0     | 0     | 0.004 | 0.002 |
| SRR5280751 | PRJNA376395 | SAMN06435089   | echino-derm   | sea urchin,<br><i>Lytechinus variegatus</i> | 0     | 0 | 0     | 0     | 0     | 0.005 | 0.003 |
| SRR5280753 | PRJNA376395 | SAMN06435087   | echino-derm   | sea urchin,<br><i>Lytechinus variegatus</i> | 0     | 0 | 0     | 0     | 0     | 0.535 | 0.267 |
| SRR5280755 | PRJNA376395 | SAMN06435085   | echino-derm   | sea urchin,<br><i>Lytechinus variegatus</i> | 0     | 0 | 0     | 0     | 0     | 0.002 | 0.001 |
| SRR5468278 | PRJNA383901 | SAMN06819339   | echino-derm   | sea star                                    | 0     | 0 | 0     | 0     | 0     | 0.044 | 0.022 |
| ERR2209755 | PRJEB23513  | SAMEA104410679 | marine lichen |                                             | 0.011 | 0 | 0     | 0.011 | 0     | 0     | 0     |
| ERR2209764 | PRJEB23513  | SAMEA104410688 | marine lichen |                                             | 0.185 | 0 | 0.185 | 0.185 | 0     | 0     | 0     |
| ERR2209765 | PRJEB23513  | SAMEA104410689 | marine lichen |                                             | 0.285 | 0 | 0     | 0.285 | 0.214 | 0     | 0     |

|            |            |                |                 |                         |       |   |       |       |       |   |   |
|------------|------------|----------------|-----------------|-------------------------|-------|---|-------|-------|-------|---|---|
| ERR2209766 | PRJEB23513 | SAMEA104410690 | marine lichen   |                         | 0.239 | 0 | 0     | 0.239 | 0.193 | 0 | 0 |
| ERR2209768 | PRJEB23513 | SAMEA104410706 | marine lichen   |                         | 0.08  | 0 | 0     | 0.08  | 0     | 0 | 0 |
| ERR2209769 | PRJEB23513 | SAMEA104410691 | marine lichen   |                         | 0     | 0 | 0     | 0     | 0.025 | 0 | 0 |
| ERR2209770 | PRJEB23513 | SAMEA104410692 | marine lichen   |                         | 0.06  | 0 | 0     | 0.06  | 0     | 0 | 0 |
| ERR2209771 | PRJEB23513 | SAMEA104410693 | marine lichen   |                         | 0     | 0 | 0     | 0     | 0.04  | 0 | 0 |
| ERR2209772 | PRJEB23513 | SAMEA104410694 | marine lichen   |                         | 0     | 0 | 0     | 0     | 0.131 | 0 | 0 |
| ERR2209773 | PRJEB23513 | SAMEA104410695 | marine lichen   |                         | 0.055 | 0 | 0     | 0.055 | 0.049 | 0 | 0 |
| ERR2209774 | PRJEB23513 | SAMEA104410696 | marine lichen   |                         | 0.071 | 0 | 0     | 0.071 | 0     | 0 | 0 |
| ERR2209775 | PRJEB23513 | SAMEA104410697 | marine lichen   |                         | 0.065 | 0 | 0     | 0.065 | 0     | 0 | 0 |
| ERR2209776 | PRJEB23513 | SAMEA104410698 | marine lichen   |                         | 0.858 | 0 | 0     | 0.858 | 0.757 | 0 | 0 |
| ERR2209779 | PRJEB23513 | SAMEA104410701 | marine lichen   |                         | 0.28  | 0 | 0.234 | 0.28  | 0.234 | 0 | 0 |
| ERR2209781 | PRJEB23513 | SAMEA104410703 | marine lichen   |                         | 0.04  | 0 | 0     | 0.04  | 0     | 0 | 0 |
| ERR2209782 | PRJEB23513 | SAMEA104410704 | marine lichen   |                         | 0.249 | 0 | 0     | 0.143 | 0.107 | 0 | 0 |
| ERR2098464 | PRJEB87662 | SAMEA104212366 | marine plankton | <i>in silico</i> sample | 0     | 0 | 0     | 0     | 0     | 0 | 0 |
| ERR2098470 | PRJEB87662 | SAMEA104212374 | marine plankton | <i>in silico</i> sample | 0     | 0 | 0     | 0     | 0     | 0 | 0 |
| ERR2098471 | PRJEB87662 | SAMEA104212375 | marine plankton | <i>in silico</i> sample | 0     | 0 | 0     | 0     | 0     | 0 | 0 |
| ERR2098474 | PRJEB87662 | SAMEA104212378 | marine plankton | <i>in silico</i> sample | 0     | 0 | 0     | 0     | 0     | 0 | 0 |
| ERR2098476 | PRJEB87662 | SAMEA104212380 | marine plankton | <i>in silico</i> sample | 0.001 | 0 | 0     | 0.001 | 0.001 | 0 | 0 |
| ERR2098481 | PRJEB87662 | SAMEA104212387 | marine plankton | <i>in silico</i> sample | 0     | 0 | 0     | 0     | 0     | 0 | 0 |
| ERR2098483 | PRJEB87662 | SAMEA104212389 | marine plankton | <i>in silico</i> sample | 0     | 0 | 0     | 0     | 0     | 0 | 0 |

|            |             |                |                 |                         |       |       |       |       |       |   |   |
|------------|-------------|----------------|-----------------|-------------------------|-------|-------|-------|-------|-------|---|---|
| ERR2098484 | PRJEB87662  | SAMEA104212390 | marine plankton | <i>in silico</i> sample | 0     | 0     | 0     | 0     | 0     | 0 | 0 |
| ERR2098525 | PRJEB87662  | SAMEA104212372 | marine plankton | <i>in silico</i> sample | 0     | 0     | 0     | 0     | 0     | 0 | 0 |
| ERR2098529 | PRJEB87662  | SAMEA104212376 | marine plankton | <i>in silico</i> sample | 0.001 | 0     | 0     | 0.001 | 0.001 | 0 | 0 |
| ERR2098530 | PRJEB87662  | SAMEA104212377 | marine plankton | <i>in silico</i> sample | 0     | 0     | 0     | 0     | 0     | 0 | 0 |
| ERR2098531 | PRJEB87662  | SAMEA104212378 | marine plankton | <i>in silico</i> sample | 0     | 0     | 0.001 | 0     | 0     | 0 | 0 |
| ERR2098535 | PRJEB87662  | SAMEA104212384 | marine plankton | <i>in silico</i> sample | 0     | 0     | 0     | 0     | 0     | 0 | 0 |
| ERR2098543 | PRJEB87662  | SAMEA104212392 | marine plankton | <i>in silico</i> sample | 0     | 0     | 0.001 | 0     | 0     | 0 | 0 |
| ERR2098576 | PRJEB87662  | SAMEA104212366 | marine plankton | <i>in silico</i> sample | 0     | 0     | 0     | 0     | 0     | 0 | 0 |
| ERR1679675 | PRJEB15713  | SAMEA4501368   | mollusc         | abalone                 | 0.017 | 0     | 0     | 0.017 | 0     | 0 | 0 |
| ERR1679689 | PRJEB15713  | SAMEA4501382   | mollusc         | abalone                 | 0     | 0     | 0.007 | 0     | 0     | 0 | 0 |
| ERR1679704 | PRJEB15713  | SAMEA4501397   | mollusc         | abalone                 | 0.005 | 0     | 0     | 0.005 | 0     | 0 | 0 |
| ERR1679721 | PRJEB15713  | SAMEA4501414   | mollusc         | abalone                 | 0.006 | 0     | 0     | 0.006 | 0     | 0 | 0 |
| SRR5620594 | PRJNA386685 | SAMN07169047   | mollusc         |                         | 0.009 | 0     | 0     | 0.009 | 0.009 | 0 | 0 |
| SRR5620595 | PRJNA386685 | SAMN07169046   | mollusc         |                         | 0.005 | 0     | 0     | 0.005 | 0.005 | 0 | 0 |
| SRR5620596 | PRJNA386685 | SAMN07169045   | mollusc         |                         | 0.022 | 0     | 0     | 0.022 | 0.022 | 0 | 0 |
| SRR5620597 | PRJNA386685 | SAMN07169044   | mollusc         |                         | 0.02  | 0     | 0     | 0.02  | 0.02  | 0 | 0 |
| SRR5620602 | PRJNA386685 | SAMN07169053   | mollusc         |                         | 0.004 | 0     | 0     | 0.004 | 0     | 0 | 0 |
| SRR5620617 | PRJNA386685 | SAMN07169054   | mollusc         |                         | 0.005 | 0     | 0     | 0.005 | 0.005 | 0 | 0 |
| SRR5620621 | PRJNA386685 | SAMN07169058   | mollusc         |                         | 0.026 | 0     | 0     | 0.026 | 0.026 | 0 | 0 |
| SRR6434179 | PRJNA428215 | SAMN07205150   | mollusc         |                         | 0.006 | 0     | 0     | 0     | 0     | 0 | 0 |
| SRR6434191 | PRJNA428215 | SAMN07204621   | mollusc         |                         | 0.031 | 0     | 0.031 | 0.031 | 0     | 0 | 0 |
| SRR7244762 | PRJNA474068 | SAMN09291245   | mollusc         | abalone                 | 0.002 | 0     | 0     | 0.002 | 0.002 | 0 | 0 |
| SRR7244765 | PRJNA474068 | SAMN09291242   | mollusc         | abalone                 | 0     | 0.004 | 0     | 0     | 0     | 0 | 0 |
| SRR7244774 | PRJNA474068 | SAMN09291231   | mollusc         | abalone                 | 0.002 | 0     | 0     | 0.002 | 0     | 0 | 0 |



|            |             |              |          |                     |       |       |       |       |       |   |   |
|------------|-------------|--------------|----------|---------------------|-------|-------|-------|-------|-------|---|---|
| SRR7244775 | PRJNA474068 | SAMN09291230 | mollusc  | abalone             | 0.002 | 0     | 0     | 0.002 | 0.002 | 0 | 0 |
| DRR090716  | PRJDB5638   | SAMD00078073 | seawater | planktonic          | 0.011 | 0     | 0     | 0.011 | 0     | 0 | 0 |
| ERR1145293 | PRJEB11870  | SAMEA3673350 | seawater | surface             | 0     | 0     | 0     | 0     | 0.003 | 0 | 0 |
| ERR1145314 | PRJEB11870  | SAMEA3673371 | seawater | surface             | 0.003 | 0     | 0     | 0.003 | 0.003 | 0 | 0 |
| ERR1145327 | PRJEB11870  | SAMEA3673384 | seawater | surface             | 0.004 | 0     | 0     | 0.004 | 0.004 | 0 | 0 |
| ERR1145330 | PRJEB11870  | SAMEA3673387 | seawater | surface             | 0     | 0     | 0     | 0     | 0.008 | 0 | 0 |
| ERR1145335 | PRJEB11870  | SAMEA3673392 | seawater | surface             | 0.004 | 0     | 0     | 0.004 | 0.004 | 0 | 0 |
| ERR1145337 | PRJEB11870  | SAMEA3673394 | seawater | surface             | 0.004 | 0     | 0     | 0.004 | 0.004 | 0 | 0 |
| ERR1145351 | PRJEB11870  | SAMEA3673408 | seawater | surface             | 0.005 | 0     | 0     | 0.005 | 0.005 | 0 | 0 |
| ERR1145352 | PRJEB11870  | SAMEA3673409 | seawater | surface             | 0     | 0     | 0     | 0     | 0.004 | 0 | 0 |
| ERR1145353 | PRJEB11870  | SAMEA3673410 | seawater | surface             | 0.005 | 0     | 0     | 0.005 | 0.005 | 0 | 0 |
| ERR1145354 | PRJEB11870  | SAMEA3673411 | seawater | surface             | 0.004 | 0     | 0     | 0.004 | 0     | 0 | 0 |
| ERR1145360 | PRJEB11870  | SAMEA3673417 | seawater | surface             | 0.002 | 0     | 0     | 0.002 | 0.002 | 0 | 0 |
| ERR1145367 | PRJEB11870  | SAMEA3673424 | seawater | surface             | 0.004 | 0     | 0     | 0.004 | 0.004 | 0 | 0 |
| ERR1145371 | PRJEB11870  | SAMEA3673428 | seawater | surface             | 0.002 | 0     | 0     | 0.002 | 0     | 0 | 0 |
| ERR1145387 | PRJEB11870  | SAMEA3673444 | seawater | surface             | 0.006 | 0     | 0     | 0.006 | 0.006 | 0 | 0 |
| ERR1145392 | PRJEB11870  | SAMEA3673449 | seawater | surface             | 0.002 | 0     | 0     | 0.002 | 0     | 0 | 0 |
| ERR1145394 | PRJEB11870  | SAMEA3673451 | seawater | surface             | 0.001 | 0     | 0     | 0.001 | 0.001 | 0 | 0 |
| ERR1145395 | PRJEB11870  | SAMEA3673452 | seawater | surface             | 0.002 | 0     | 0     | 0.002 | 0.002 | 0 | 0 |
| ERR1433668 | PRJEB12234  | SAMEA4020579 | seawater |                     | 0     | 0.009 | 0     | 0     | 0     | 0 | 0 |
| ERR1433681 | PRJEB12234  | SAMEA4020592 | seawater |                     | 0     | 0     | 0     | 0     | 0     | 0 | 0 |
| ERR1578841 | PRJEB14899  | SAMEA4353568 | seawater | oil<br>accomodated  | 0     | 0     | 0.001 | 0     | 0     | 0 | 0 |
| ERR867783  | PRJEB8682   | SAMEA3275466 | seawater |                     | 0.002 | 0     | 0     | 0.002 | 0.002 | 0 | 0 |
| ERR867837  | PRJEB8682   | SAMEA3275491 | seawater |                     | 0     | 0     | 0     | 0     | 0.05  | 0 | 0 |
| SRR1662190 | PRJNA268133 | SAMN03217544 | seawater |                     | 0.002 | 0     | 0     | 0.002 | 0.002 | 0 | 0 |
| SRR1734277 | PRJNA268533 | SAMN03223628 | seawater |                     | 0     | 0.026 | 0     | 0     | 0     | 0 | 0 |
| SRR1819671 | PRJNA275249 | SAMN03353589 | seawater | coral<br>associated | 0     | 0.01  | 0     | 0     | 0     | 0 | 0 |

|            |             |              |          |                  |       |       |       |       |       |   |       |
|------------|-------------|--------------|----------|------------------|-------|-------|-------|-------|-------|---|-------|
| SRR1819674 | PRJNA275249 | SAMN03353592 | seawater | coral associated | 0     | 0.003 | 0     | 0     | 0     | 0 | 0     |
| SRR1819721 | PRJNA275249 | SAMN03353595 | seawater | coral associated | 0     | 0.024 | 0     | 0     | 0     | 0 | 0     |
| SRR1819723 | PRJNA275249 | SAMN03353598 | seawater |                  | 0     | 0     | 0     | 0     | 0     | 0 | 0.039 |
| SRR1819727 | PRJNA275249 | SAMN03353603 | seawater | coral associated | 0     | 0.02  | 0     | 0     | 0     | 0 | 0     |
| SRR1819729 | PRJNA275249 | SAMN03353605 | seawater | coral associated | 0     | 0.009 | 0     | 0     | 0     | 0 | 0     |
| SRR1819740 | PRJNA275249 | SAMN03353614 | seawater | coral associated | 0     | 0.004 | 0     | 0     | 0     | 0 | 0     |
| SRR1927857 | PRJNA279146 | SAMN03436114 | seawater |                  | 0     | 0.009 | 0     | 0     | 0     | 0 | 0     |
| SRR1927891 | PRJNA279146 | SAMN03436127 | seawater |                  | 0     | 0     | 0     | 0     | 0     | 0 | 0.013 |
| SRR2097599 | PRJNA283545 | SAMN03847006 | seawater |                  | 0.096 | 0     | 0     | 0.096 | 0.096 | 0 | 0     |
| SRR2808381 | PRJNA299536 | SAMN04209913 | seawater | algae associated | 0.01  | 0     | 0     | 0.01  | 0.01  | 0 | 0     |
| SRR2808383 | PRJNA299536 | SAMN04209913 | seawater | algae associated | 0.006 | 0     | 0     | 0.006 | 0.006 | 0 | 0     |
| SRR2808779 | PRJNA299536 | SAMN04209914 | seawater | algae associated | 0.104 | 0     | 0     | 0.104 | 0.104 | 0 | 0     |
| SRR2808988 | PRJNA299536 | SAMN04209914 | seawater | algae associated | 0.011 | 0     | 0     | 0.011 | 0.011 | 0 | 0     |
| SRR2819368 | PRJNA299536 | SAMN04209914 | seawater | algae associated | 0.019 | 0     | 0     | 0.019 | 0.019 | 0 | 0     |
| SRR2975942 | PRJNA304389 | SAMN04299799 | seawater |                  | 0.001 | 0     | 0.001 | 0.001 | 0     | 0 | 0     |
| SRR2993394 | PRJNA305512 | SAMN04328997 | seawater |                  | 0.02  | 0     | 0.02  | 0.02  | 0.02  | 0 | 0     |
| SRR2993396 | PRJNA305512 | SAMN04328999 | seawater |                  | 0.015 | 0     | 0     | 0.015 | 0.015 | 0 | 0     |
| SRR2993399 | PRJNA305512 | SAMN04329002 | seawater |                  | 0.047 | 0     | 0     | 0.047 | 0.047 | 0 | 0     |
| SRR2993401 | PRJNA305512 | SAMN04329004 | seawater |                  | 0.024 | 0     | 0     | 0.024 | 0     | 0 | 0     |
| SRR2993402 | PRJNA305512 | SAMN04329005 | seawater |                  | 0.015 | 0     | 0     | 0.015 | 0.015 | 0 | 0     |
| SRR3146264 | PRJNA309390 | SAMN04433038 | seawater |                  | 0     | 0.014 | 0     | 0     | 0     | 0 | 0     |
| SRR3184418 | PRJNA312300 | SAMN04497633 | seawater |                  | 0     | 0.055 | 0     | 0     | 0     | 0 | 0     |
| SRR3184419 | PRJNA312300 | SAMN04497634 | seawater |                  | 0     | 0     | 0     | 0     | 0     | 0 | 0.015 |
| SRR3184431 | PRJNA312300 | SAMN04497646 | seawater |                  | 0     | 0     | 0     | 0     | 0     | 0 | 0.015 |

|            |             |              |          |         |       |       |       |       |       |   |       |       |
|------------|-------------|--------------|----------|---------|-------|-------|-------|-------|-------|---|-------|-------|
| SRR3647521 | PRJNA324417 | SAMN05203189 | seawater |         | 0     | 0.01  | 0     | 0     | 0     | 0 | 0     | 0.006 |
| SRR3669451 | PRJNA325151 | SAMN05209046 | seawater |         | 0.007 | 0     | 0     | 0     | 0     | 0 | 0     | 0     |
| SRR5640746 | PRJNA388809 | SAMN07185828 | seawater | surface | 0     | 0.001 | 0     | 0     | 0     | 0 | 0     | 0     |
| SRR5640747 | PRJNA388809 | SAMN07185871 | seawater |         | 0     | 0.004 | 0     | 0     | 0     | 0 | 0     | 0     |
| SRR5640756 | PRJNA388809 | SAMN07185868 | seawater |         | 0     | 0.003 | 0     | 0     | 0     | 0 | 0     | 0     |
| SRR5640856 | PRJNA388812 | SAMN07187154 | seawater |         | 0     | 0.048 | 0     | 0     | 0     | 0 | 0     | 0     |
| SRR5640862 | PRJNA388812 | SAMN07187152 | seawater |         | 0     | 0     | 0     | 0     | 0     | 0 | 0.149 | 0.075 |
| SRR5640883 | PRJNA388812 | SAMN07187158 | seawater |         | 0     | 0.013 | 0     | 0     | 0     | 0 | 0     | 0     |
| SRR5640906 | PRJNA388812 | SAMN07187137 | seawater |         | 0     | 0.065 | 0     | 0     | 0     | 0 | 0     | 0     |
| SRR5640908 | PRJNA388812 | SAMN07187135 | seawater |         | 0     | 0.039 | 0     | 0     | 0     | 0 | 0     | 0     |
| SRR5640913 | PRJNA388812 | SAMN07187140 | seawater |         | 0     | 0.018 | 0     | 0     | 0     | 0 | 0     | 0     |
| SRR5640916 | PRJNA388812 | SAMN07187091 | seawater |         | 0     | 0.005 | 0     | 0     | 0     | 0 | 0     | 0     |
| SRR5640928 | PRJNA388812 | SAMN07187110 | seawater |         | 0     | 0.005 | 0     | 0     | 0     | 0 | 0     | 0     |
| SRR5640929 | PRJNA388812 | SAMN07187109 | seawater |         | 0.003 | 0     | 0     | 0.003 | 0.003 | 0 | 0     | 0     |
| SRR5640932 | PRJNA388812 | SAMN07187106 | seawater |         | 0     | 0.005 | 0     | 0     | 0     | 0 | 0     | 0     |
| SRR5640936 | PRJNA388812 | SAMN07187115 | seawater |         | 0     | 0.027 | 0     | 0     | 0     | 0 | 0     | 0     |
| SRR5640958 | PRJNA388812 | SAMN07187101 | seawater |         | 0     | 0.003 | 0     | 0     | 0     | 0 | 0     | 0     |
| SRR5877064 | PRJNA358589 | SAMN07374776 | seawater | coastal | 0.003 | 0     | 0     | 0.003 | 0.003 | 0 | 0     | 0     |
| SRR5918861 | PRJNA385736 | SAMN07483521 | seawater | pelagic | 0     | 0     | 0.006 | 0     | 0     | 0 | 0     | 0     |
| SRR6401393 | PRJNA385736 | SAMN08219415 | seawater | coastal | 0     | 0     | 0     | 0.018 | 0     | 0 | 0     | 0     |
| SRR6401795 | PRJNA385736 | SAMN08219576 | seawater | coastal | 0     | 0     | 0     | 0.035 | 0     | 0 | 0     | 0     |
| SRR6457099 | PRJNA429259 | SAMN08327522 | seawater |         | 0     | 0.009 | 0     | 0     | 0     | 0 | 0     | 0     |
| SRR6457207 | PRJNA429259 | SAMN08327467 | seawater |         | 0     | 0.046 | 0     | 0     | 0     | 0 | 0     | 0     |
| SRR7035597 | PRJNA385736 | SAMN08954024 | seawater | coastal | 0     | 0     | 0     | 0.009 | 0     | 0 | 0     | 0     |
| SRR7598258 | PRJNA482722 | SAMN09711465 | seawater |         | 0     | 0.053 | 0     | 0     | 0     | 0 | 0     | 0     |
| SRR7633224 | PRJNA483963 | SAMN09754533 | seawater | coastal | 0.003 | 0     | 0     | 0.003 | 0.003 | 0 | 0     | 0     |
| DRR027450  | PRJDB3347   | SAMD00023376 | sponge   |         | 0.008 | 0     | 0     | 0.008 | 0.008 | 0 | 0     | 0     |

|            |             |                |        |                         |        |       |   |        |        |       |   |
|------------|-------------|----------------|--------|-------------------------|--------|-------|---|--------|--------|-------|---|
| DRR027451  | PRJDB3347   | SAMD00023376   | sponge |                         | 0.007  | 0     | 0 | 0.007  | 0.007  | 0.011 | 0 |
| DRR027453  | PRJDB3347   | SAMD00023377   | sponge |                         | 0.001  | 0     | 0 | 0.001  | 0.001  | 0     | 0 |
| ERR2073734 | PRJEB22033  | SAMEA104190825 | sponge | <i>Dysidea avara</i>    | 0.045  | 0     | 0 | 0.045  | 0      | 0     | 0 |
| SRR1039445 | PRJNA229984 | SAMN02420362   | sponge |                         | 0.208  | 0     | 0 | 0.208  | 0.208  | 0     | 0 |
| SRR2154157 | PRJNA292036 | SAMN03960302   | sponge |                         | 0.608  | 0     | 0 | 0.608  | 0.608  | 0     | 0 |
| SRR2154172 | PRJNA292036 | SAMN03960309   | sponge |                         | 0.075  | 0     | 0 | 0.075  | 0.075  | 0     | 0 |
| SRR2154175 | PRJNA292036 | SAMN03960338   | sponge |                         | 0.116  | 0     | 0 | 0.116  | 0.116  | 0     | 0 |
| SRR2154188 | PRJNA292036 | SAMN03960303   | sponge |                         | 41.394 | 0     | 0 | 41.394 | 41.394 | 0     | 0 |
| SRR2154190 | PRJNA292036 | SAMN03960336   | sponge |                         | 0.322  | 0     | 0 | 0.322  | 0.322  | 0     | 0 |
| SRR2154191 | PRJNA292036 | SAMN03960339   | sponge |                         | 16.552 | 0     | 0 | 16.552 | 16.552 | 0     | 0 |
| SRR2154192 | PRJNA292036 | SAMN03960307   | sponge |                         | 2.042  | 0     | 0 | 2.042  | 2.042  | 0     | 0 |
| SRR2154193 | PRJNA292036 | SAMN03960337   | sponge |                         | 38.444 | 0     | 0 | 38.444 | 38.444 | 0     | 0 |
| SRR2154195 | PRJNA292036 | SAMN03960340   | sponge |                         | 33.034 | 0     | 0 | 33.034 | 33.034 | 0     | 0 |
| SRR2972724 | PRJNA301178 | SAMN04308135   | sponge |                         | 0      | 0.167 | 0 | 0      | 0      | 0     | 0 |
| SRR2972730 | PRJNA301178 | SAMN04308135   | sponge |                         | 0      | 0.43  | 0 | 0      | 0      | 0     | 0 |
| SRR2976095 | PRJNA301178 | SAMN04308129   | sponge | <i>Cinachyrella sp.</i> | 0      | 0.386 | 0 | 0      | 0      | 0     | 0 |
| SRR2976096 | PRJNA301178 | SAMN04308130   | sponge | <i>Cinachyrella sp.</i> | 0      | 0.223 | 0 | 0      | 0      | 0     | 0 |
| SRR2976097 | PRJNA301178 | SAMN04308131   | sponge | <i>Cinachyrella sp.</i> | 0      | 0.303 | 0 | 0      | 0      | 0     | 0 |
| SRR2976098 | PRJNA301178 | SAMN04308132   | sponge | seawater                | 0      | 0.086 | 0 | 0      | 0      | 0     | 0 |
| SRR2976099 | PRJNA301178 | SAMN04308133   | sponge | seawater                | 0      | 0.175 | 0 | 0      | 0      | 0     | 0 |
| SRR2976100 | PRJNA301178 | SAMN04308134   | sponge | seawater                | 0      | 0.181 | 0 | 0      | 0      | 0     | 0 |
| SRR2976103 | PRJNA301178 | SAMN04308137   | sponge |                         | 0      | 0.224 | 0 | 0      | 0      | 0     | 0 |
| SRR2976104 | PRJNA301178 | SAMN04308138   | sponge |                         | 0      | 1.579 | 0 | 0      | 0      | 0     | 0 |
| SRR2976105 | PRJNA301178 | SAMN04308139   | sponge |                         | 0      | 0.04  | 0 | 0      | 0      | 0     | 0 |
| SRR2976106 | PRJNA301178 | SAMN04308140   | sponge |                         | 0      | 0.266 | 0 | 0      | 0      | 0     | 0 |
| SRR2976107 | PRJNA301178 | SAMN04308141   | sponge |                         | 0      | 1.38  | 0 | 0      | 0      | 0     | 0 |

|            |             |              |          |                      |       |       |   |       |       |       |       |
|------------|-------------|--------------|----------|----------------------|-------|-------|---|-------|-------|-------|-------|
| SRR2976115 | PRJNA301178 | SAMN04308149 | sponge   |                      | 0     | 1.644 | 0 | 0     | 0     | 0     | 0     |
| SRR2976117 | PRJNA301178 | SAMN04308151 | sponge   |                      | 0     | 3.174 | 0 | 0     | 0     | 0     | 0     |
| SRR2976126 | PRJNA301178 | SAMN04308160 | sponge   |                      | 0     | 0.054 | 0 | 0     | 0     | 0     | 0     |
| SRR4244547 | PRJNA342549 | SAMN05762057 | sponge   | <i>Ircinia felix</i> | 0     | 0.004 | 0 | 0     | 0     | 0     | 0     |
| SRR6428887 | PRJNA427280 | SAMN08226088 | sponge   |                      | 0     | 0     | 0 | 0.001 | 0     | 0     | 0     |
| SRR7177965 | PRJNA453898 | SAMN09220636 | sponge   |                      | 0     | 0.443 | 0 | 0     | 0     | 0     | 0     |
| SRR7177972 | PRJNA453898 | SAMN09220633 | sponge   |                      | 0     | 0.011 | 0 | 0     | 0     | 0     | 0     |
| SRR7178012 | PRJNA453898 | SAMN09220629 | sponge   |                      | 0     | 0.009 | 0 | 0     | 0     | 0     | 0     |
| SRR7178014 | PRJNA453898 | SAMN09220625 | sponge   |                      | 0     | 0.249 | 0 | 0     | 0     | 0     | 0     |
| SRR7178015 | PRJNA453898 | SAMN09220626 | sponge   |                      | 0     | 0.119 | 0 | 0     | 0     | 0     | 0     |
| SRR7178016 | PRJNA453898 | SAMN09220627 | sponge   |                      | 0     | 0.02  | 0 | 0     | 0     | 0     | 0     |
| SRR7178017 | PRJNA453898 | SAMN09220628 | sponge   |                      | 0     | 0.072 | 0 | 0     | 0     | 0     | 0     |
| SRR7178020 | PRJNA453898 | SAMN09220623 | sponge   |                      | 0.004 | 0     | 0 | 0.004 | 0.004 | 0     | 0     |
| SRR7178026 | PRJNA453898 | SAMN09220676 | sponge   |                      | 0     | 0.013 | 0 | 0     | 0     | 0     | 0     |
| SRR7178027 | PRJNA453898 | SAMN09220675 | sponge   |                      | 0     | 0.005 | 0 | 0     | 0     | 0     | 0     |
| SRR7513539 | PRJNA479568 | SAMN09605380 | sponge   |                      | 0     | 0.022 | 0 | 0     | 0     | 0     | 0     |
| SRR7513549 | PRJNA479568 | SAMN09605374 | sponge   |                      | 0     | 0.026 | 0 | 0     | 0     | 0     | 0     |
| SRR7513601 | PRJNA479655 | SAMN09604650 | sponge   |                      | 0     | 0.064 | 0 | 0     | 0     | 0     | 0     |
| SRR7513603 | PRJNA479655 | SAMN09604634 | sponge   |                      | 0     | 0.107 | 0 | 0     | 0     | 0     | 0     |
| SRR7513605 | PRJNA479655 | SAMN09604632 | sponge   |                      | 0     | 0.09  | 0 | 0     | 0     | 0.039 | 0.019 |
| SRR7513607 | PRJNA479655 | SAMN09604638 | sponge   |                      | 0     | 0     | 0 | 0     | 0     | 0.015 | 0.007 |
| SRR7513608 | PRJNA479655 | SAMN09604635 | sponge   |                      | 0     | 0     | 0 | 0     | 0     | 0.004 | 0.002 |
| SRR7513609 | PRJNA479655 | SAMN09604636 | sponge   |                      | 0     | 0     | 0 | 0     | 0     | 0.026 | 0.013 |
| SRR768455  |             | SAMN00780655 | sponge   |                      | 0     | 6.667 | 0 | 0     | 0     | 0     | 0     |
| SRR768472  |             | SAMN00780660 | sponge   |                      | 0     | 0.341 | 0 | 0     | 0     | 0     | 0     |
| DRR090690  | PRJDB5638   | SAMD00078047 | tunicate | sea squirt           | 0.041 | 0     | 0 | 0.041 | 0     | 0     | 0     |
| DRR090694  | PRJDB5638   | SAMD00078051 | tunicate | sea squirt           | 0.078 | 0     | 0 | 0.078 | 0     | 0     | 0     |

|            |             |              |                             |                                |       |       |       |       |      |       |       |
|------------|-------------|--------------|-----------------------------|--------------------------------|-------|-------|-------|-------|------|-------|-------|
| DRR090696  | PRJDB5638   | SAMD00078053 | tunicate                    | sea squirt                     | 0.366 | 0     | 0     | 0.366 | 0    | 0     | 0     |
| DRR090702  | PRJDB5638   | SAMD00078059 | tunicate                    | sea squirt                     | 0.035 | 0     | 0     | 0.035 | 0    | 0     | 0     |
| DRR090705  | PRJDB5638   | SAMD00078062 | tunicate                    | sea squirt                     | 0.04  | 0     | 0     | 0.04  | 0    | 0     | 0     |
| DRR090706  | PRJDB5638   | SAMD00078063 | tunicate                    | sea squirt                     | 0     | 0     | 0     | 0     | 0    | 0     | 0     |
| DRR090711  | PRJDB5638   | SAMD00078068 | tunicate                    | sea squirt                     | 0.08  | 0     | 0     | 0.08  | 0    | 0     | 0     |
| DRR090714  | PRJDB5638   | SAMD00078071 | tunicate                    | sea squirt                     | 0.19  | 0     | 0     | 0.19  | 0    | 0     | 0.066 |
| SRR2994101 | PRJNA305909 | SAMN04334514 | tunicate                    | sea squirt                     | 0.159 | 0     | 0     | 0.159 | 0    | 0     | 0     |
| SRR2994143 | PRJNA305909 | SAMN04334552 | tunicate                    | sea squirt                     | 0.052 | 0     | 0     | 0.052 | 0    | 0     | 0     |
| SRR2994155 | PRJNA305909 | SAMN04334563 | tunicate                    | sea squirt                     | 0.102 | 0     | 0     | 0.102 | 0    | 0     | 0     |
| ERR2608107 | PRJEB26735  | SAMEA4701556 | algae                       | <i>Ascophyllum nodosum</i>     | 0.002 | 0     | 0.002 | 0.002 | 0    | 0     | 0     |
| ERR2612167 | PRJEB25256  | SAMEA4707959 | algae                       |                                | 0.002 | 0     | 0.002 | 0     | 0    | 0     | 0     |
| SRR7598245 | PRJNA482722 | SAMN09711450 | algae                       |                                | 0     | 0.519 | 0     | 0     | 0    | 0     | 0     |
| SRR7598259 | PRJNA482722 | SAMN09711484 | blank                       | coral negative control         | 0     | 2.376 | 0     | 0     | 0    | 0     | 0     |
| SRR6187169 | PRJNA414515 | SAMN07806884 | canine feces                |                                | 0     | 0     | 0     | 0     | 0    | 0.006 | 0.003 |
| SRR1528894 | PRJNA255238 | SAMN02923789 | contin-uous culture biomass |                                | 0.05  | 0     | 0     | 0.05  | 0.05 | 0     | 0     |
| SRR1563085 | PRJNA260027 | SAMN03016022 | crusta-cean                 |                                | 0     | 0     | 0     | 0     | 0    | 0     | 0.007 |
| SRR2072205 | PRJNA287619 | SAMN03784717 | crusta-cean                 | <i>Penaeus monodon</i>         | 0     | 0.001 | 0     | 0     | 0    | 0     | 0     |
| SRR2072206 | PRJNA287619 | SAMN03784718 | crusta-cean                 | <i>Penaeus monodon</i>         | 0     | 0     | 0     | 0     | 0    | 0     | 0     |
| ERR1638126 | PRJEB15432  | SAMEA4443155 | dairy fermentation          |                                | 0     | 0     | 0.096 | 0     | 0    | 0     | 0     |
| SRR3536885 | PRJNA320639 | SAMN04957371 | estuarine water             |                                | 0     | 0     | 0     | 0     | 0    | 0     | 0.002 |
| ERR688133  | PRJEB7828   | SAMEA3140714 | landplant                   | <i>Metrosideros polymorpha</i> | 0.002 | 0     | 0     | 0.002 | 0    | 0     | 0     |
| SRR3536878 | PRJNA320639 | SAMN04957364 | marine NA                   |                                | 0.008 | 0     | 0     | 0.008 | 0    | 0     | 0     |
| SRR3171429 | PRJNA311983 | SAMN04491975 | marine biofilm on           |                                | 0     | 0.301 | 0     | 0     | 0    | 0     | 0     |

|            |             |                |                                  |                          |       |       |   |       |   |       |       |
|------------|-------------|----------------|----------------------------------|--------------------------|-------|-------|---|-------|---|-------|-------|
|            |             |                | corroded steel                   |                          |       |       |   |       |   |       |       |
| SRR3171430 | PRJNA311983 | SAMN04491976   | marine biofilm on corroded steel |                          | 0     | 0.107 | 0 | 0     | 0 | 0     | 0     |
| SRR3171431 | PRJNA311983 | SAMN04491977   | marine biofilm on corroded steel |                          | 0     | 1.451 | 0 | 0     | 0 | 0     | 0     |
| SRR3171432 | PRJNA311983 | SAMN04491978   | marine biofilm on corroded steel |                          | 0     | 1.749 | 0 | 0     | 0 | 0     | 0     |
| SRR3170225 | PRJNA310850 | SAMN04457233   | oil field                        |                          | 0     | 0     | 0 | 0     | 0 | 0.039 | 0.02  |
| SRR6435254 | PRJNA428129 | SAMN08281134   | oil field                        |                          | 0     | 0     | 0 | 0     | 0 | 1.253 | 0.627 |
| SRR6435261 | PRJNA428129 | SAMN08281127   | oil field                        |                          | 0     | 0     | 0 | 0     | 0 | 2.782 | 1.391 |
| ERR867764  | PRJEB8682   | SAMEA3275621   | reef environment                 |                          | 0     | 0.015 | 0 | 0     | 0 | 0     | 0     |
| SRR1293925 |             | SAMN02796399   | skin                             |                          | 0     | 0     | 0 | 0     | 0 | 0.005 | 0.003 |
| ERR1777360 | PRJEB14655  | SAMEA43942168  | squid                            | <i>Euprymna scolopes</i> | 0     | 0.077 | 0 | 0     | 0 | 0     | 0     |
| ERR2210048 | PRJEB23513  | SAMEA104410709 | synthetic                        |                          | 0.006 | 0     | 0 | 0.012 | 0 | 0     | 0     |
| SRR1735276 | PRJNA271063 | SAMN03272672   | <i>Thalassia hemprichii</i>      |                          | 0     | 0     | 0 | 0     | 0 | 0     | 0.105 |

1

<sup>1</sup> Lagkouvardos I, Joseph D, Kapfhammer M, Giritli S, Horn M, Haller D, et al. IMNGS: A comprehensive open resource of processed 16S rRNA microbial profiles for ecology and diversity studies. Sci Rep . 2016;6(April):1–9. Available from: <http://dx.doi.org/10.1038/srep33721>

**Tab S5. PFAM domains used to identify restriction-modification systems in *Pseudovibrio* genomes.**

| <b>Accession</b> | <b>ID</b>       | <b>Description</b>                                                |
|------------------|-----------------|-------------------------------------------------------------------|
| PF01420          | Methylase_S     | Type I restriction modification DNA specificity domain            |
| PF04313          | HSDR_N          | Type I restriction enzyme R protein N terminus (HSDR_N)           |
| PF06616          | BsuBI_PstI_RE   | BsuBI/PstI restriction endonuclease domain                        |
| PF07669          | Eco57I          | Eco57I restriction-modification methylase                         |
| PF12008          | EcoR124_C       | Type I restriction and modification enzyme - subunit R C terminal |
| PF12564          | TypeIII_RM_meth | Type III restriction/modification enzyme methylation subunit      |
| PF13588          | HSDR_N_2        | Type I restriction enzyme R protein N terminus (HSDR_N)           |
| PF05066          | HARE-HTH        | HB1, ASXL, restriction endonuclease HTH domain                    |
| PF07275          | ArdA            | Antirestriction protein (ArdA)                                    |
| PF08819          | DUF1802         | Domain of unknown function (DUF1802)                              |
| PF10592          | AIPR            | AIPR protein                                                      |
| PF11058          | Ral             | Antirestriction protein Ral                                       |
| PF13707          | RloB            | RloB-like protein                                                 |
| PF14354          | Lar_restr_allev | Restriction alleviation protein Lar                               |
| PF17728          | BsuBI_PstI_RE_N | BsuBI/PstI restriction endonuclease HTH domain                    |
| PF18135          | Type_ISP_C      | Type ISP C-terminal specificity domain                            |
| PF18273          | T3RM_EcoP15I_C  | Type III R-M EcoP15I C-terminal domain                            |
| PF18062          | RE_AspBHI_N     | Restriction endonuclease AspBHI N-terminal                        |
| PF02384          | N6_Mtase        | N-6 DNA Methylase                                                 |
| PF02963          | EcoRI           | Restriction endonuclease EcoRI                                    |
| PF04471          | Mrr_cat         | Restriction endonuclease                                          |
| PF09015          | NgoMIV_restric  | NgoMIV restriction enzyme                                         |
| PF09019          | EcoRII-C        | EcoRII C terminal                                                 |
| PF02980          | FokI_C          | Restriction endonuclease FokI, catalytic domain                   |
| PF02981          | FokI_N          | Restriction endonuclease FokI, recognition domain                 |
| PF04555          | XhoI            | Restriction endonuclease XhoI                                     |
| PF04556          | DpnII           | DpnII restriction endonuclease                                    |



|         |                 |                                                     |
|---------|-----------------|-----------------------------------------------------|
| PF09126 | NaeI            | Restriction endonuclease NaeI                       |
| PF09194 | Endonuc-BsobI   | Restriction endonuclease BsobI                      |
| PF09195 | Endonuc-BglIII  | Restriction endonuclease BglIII                     |
| PF09208 | Endonuc-MspI    | Restriction endonuclease MspI                       |
| PF09226 | Endonuc-HincII  | Restriction endonuclease HincII                     |
| PF09254 | Endonuc-FokI_C  | Restriction endonuclease FokI, C terminal           |
| PF09519 | RE_HindVP       | HindVP restriction endonuclease                     |
| PF09520 | RE_TdeIII       | Type II restriction endonuclease, TdeIII            |
| PF09521 | RE_NgoPII       | NgoPII restriction endonuclease                     |
| PF09553 | RE_Eco47II      | Eco47II restriction endonuclease                    |
| PF09567 | RE_MamI         | MamI restriction endonuclease                       |
| PF09568 | RE_MjaI         | MjaI restriction endonuclease                       |
| PF09570 | RE_SinI         | SinI restriction endonuclease                       |
| PF09571 | RE_XcyI         | XcyI restriction endonuclease                       |
| PF09572 | RE_XamI         | XamI restriction endonuclease                       |
| PF09573 | RE_TaqI         | TaqI restriction endonuclease                       |
| PF00145 | DNA_methylase   | C-5 cytosine-specific DNA methylase                 |
| PF01555 | N6_N4_Mtase     | DNA methylase                                       |
| PF02086 | MethyltransfD12 | D12 class N6 adenine-specific DNA methyltransferase |
| PF08463 | EcoEI_R_C       | EcoEI R protein C-terminal                          |
| PF09491 | RE_AlwI         | AlwI restriction endonuclease                       |
| PF09504 | RE_Bsp6I        | Bsp6I restriction endonuclease                      |
| PF09561 | RE_HpaII        | HpaII restriction endonuclease                      |
| PF11463 | R-HINP1I        | R.HinP1I restriction endonuclease                   |
| PF02923 | BamHI           | Restriction endonuclease BamHI                      |
| PF06300 | Tsp45I          | Tsp45I type II restriction enzyme                   |
| PF07832 | Bse634I         | Cfr10I/Bse634I restriction endonuclease             |
| PF09217 | EcoRII-N        | Restriction endonuclease EcoRII, N-terminal         |
| PF09225 | Endonuc-PvuII   | Restriction endonuclease PvuII                      |
| PF09233 | Endonuc-EcoRV   | Restriction endonuclease EcoRV                      |

|         |                 |                                                 |
|---------|-----------------|-------------------------------------------------|
| PF09499 | RE_ApaLI        | ApaLI-like restriction endonuclease             |
| PF09516 | RE_CfrBI        | CfrBI restriction endonuclease                  |
| PF09517 | RE_Eco29kI      | Eco29kI restriction endonuclease                |
| PF09518 | RE_HindIII      | HindIII restriction endonuclease                |
| PF09545 | RE_AccI         | AccI restriction endonuclease                   |
| PF09554 | RE_HaeII        | HaeII restriction endonuclease                  |
| PF09556 | RE_HaeIII       | HaeIII restriction endonuclease                 |
| PF09562 | RE_LlaMI        | LlaMI restriction endonuclease                  |
| PF09564 | RE_NgoBV        | NgoBV restriction endonuclease                  |
| PF09565 | RE_NgoFVII      | NgoFVII restriction endonuclease                |
| PF09566 | RE_SacI         | SacI restriction endonuclease                   |
| PF09569 | RE_ScaI         | ScaI restriction endonuclease                   |
| PF09665 | RE_Alw26IDE     | Type II restriction endonuclease (RE_Alw26IDE)  |
| PF11564 | BpuJI_N         | Restriction endonuclease BpuJI - N terminal     |
| PF04851 | ResIII          | Type III restriction enzyme, res subunit        |
| PF09509 | Hypoth_Ymh      | Protein of unknown function (Hypoth_ymh)        |
| PF09563 | RE_LlaJI        | LlaJI restriction endonuclease                  |
| PF12161 | HsdM_N          | HsdM N-terminal domain                          |
| PF13156 | Mrr_cat_2       | Restriction endonuclease                        |
| PF13643 | DUF4145         | Domain of unknown function (DUF4145)            |
| PF14511 | RE_EcoO109I     | Type II restriction endonuclease EcoO109I       |
| PF15514 | ThaI            | Restriction endonuclease ThaI                   |
| PF15516 | BpuSI_N         | BpuSI N-terminal domain                         |
| PF18643 | RE_BsaWI        | BsaWI restriction endonuclease type 2           |
| PF18755 | RAMA            | Restriction Enzyme Adenine Methylase Associated |
| PF08684 | ocr             | DNA mimic ocr                                   |
| PF11407 | RestrictionMunI | Type II restriction enzyme MunI                 |
| PF12957 | DUF3846         | Domain of unknown function (DUF3846)            |

**Tab S6. PFAM domains used to identify transposases in *Pseudovibrio* genomes**

| Accession | ID              | Description                               |
|-----------|-----------------|-------------------------------------------|
| PF01498   | HTH_Tnp_Tc3_2   | Transposase                               |
| PF01609   | DDE_Tnp_1       | Transposase DDE domain                    |
| PF01797   | Y1_Tnp          | Transposase IS200 like                    |
| PF02914   | DDE_2           | Bacteriophage Mu transposase              |
| PF11427   | HTH_Tnp_Tc3_1   | Tc3 transposase                           |
| PF01359   | Transposase_1   | Transposase (partial DDE domain)          |
| PF02281   | Dimer_Tnp_Tn5   | Transposase Tn5 dimerisation domain       |
| PF02316   | HTH_Tnp_Mu_1    | Mu DNA-binding domain                     |
| PF05699   | Dimer_Tnp_hAT   | hAT family C-terminal dimerisation region |
| PF09299   | Mu-transpos_C   | Mu transposase, C-terminal                |
| PF14706   | Tnp_DNA_bind    | Transposase DNA-binding                   |
| PF17906   | HTH_48          | HTH domain in Mos1 transposase            |
| PF00872   | Transposase_mut | Transposase, Mutator family               |
| PF01526   | DDE_Tnp_Tn3     | Tn3 transposase DDE domain                |
| PF01527   | HTH_Tnp_1       | Transposase                               |
| PF01548   | DEDD_Tnp_IS110  | Transposase                               |
| PF02371   | Transposase_20  | Transposase IS116/IS110/IS902 family      |
| PF03400   | DDE_Tnp_IS1     | IS1 transposase                           |
| PF04986   | Y2_Tnp          | Putative transposase                      |
| PF12017   | Tnp_P_element   | Transposase protein                       |
| PF01385   | OrfB_IS605      | Probable transposase                      |
| PF01610   | DDE_Tnp_ISL3    | Transposase                               |
| PF01710   | HTH_Tnp_IS630   | Transposase                               |
| PF03004   | Transposase_24  | Plant transposase (Ptta/En/Spm family)    |
| PF03050   | DDE_Tnp_IS66    | Transposase IS66 family                   |
| PF03108   | DBD_Tnp_Mut     | MuDR family transposase                   |
| PF03221   | HTH_Tnp_Tc5     | Tc5 transposase DNA-binding domain        |
| PF04693   | DDE_Tnp_2       | Archaeal putative transposase ISC1217     |

|         |                 |                                                    |
|---------|-----------------|----------------------------------------------------|
| PF04754 | Transposase_31  | Putative transposase, YhgA-like                    |
| PF04827 | Plant_tran      | Plant transposon protein                           |
| PF04937 | DUF659          | Protein of unknown function (DUF 659)              |
| PF05598 | DUF772          | Transposase domain (DUF772)                        |
| PF07282 | OrfB_Zn_ribbon  | Putative transposase DNA-binding domain            |
| PF07592 | DDE_Tnp_ISAZ013 | Rhodopirellula transposase DDE domain              |
| PF08483 | IstB_IS21_ATP   | IstB-like ATP binding N-terminal                   |
| PF08721 | Tn7_Tnp_TnsA_C  | TnsA endonuclease C terminal                       |
| PF08722 | Tn7_Tnp_TnsA_N  | TnsA endonuclease N terminal                       |
| PF10551 | MULE            | MULE transposase domain                            |
| PF12323 | HTH_OrfB_IS605  | Helix-turn-helix domain                            |
| PF12596 | Tnp_P_element_C | 87kDa Transposase                                  |
| PF12760 | Zn_Tnp_IS1595   | Transposase zinc-ribbon domain                     |
| PF12762 | DDE_Tnp_IS1595  | ISXO2-like transposase domain                      |
| PF13005 | zf-IS66         | zinc-finger binding domain of transposase IS66     |
| PF13006 | Nterm_IS4       | Insertion element 4 transposase N-terminal         |
| PF13007 | LZ_Tnp_IS66     | Transposase C of IS166 homeodomain                 |
| PF13011 | LZ_Tnp_IS481    | leucine-zipper of insertion element IS481          |
| PF13340 | DUF4096         | Putative transposase of IS4/5 family (DUF4096)     |
| PF13358 | DDE_3           | DDE superfamily endonuclease                       |
| PF13359 | DDE_Tnp_4       | DDE superfamily endonuclease                       |
| PF13542 | HTH_Tnp_ISL3    | Helix-turn-helix domain of transposase family ISL3 |
| PF13546 | DDE_5           | DDE superfamily endonuclease                       |
| PF13586 | DDE_Tnp_1_2     | Transposase DDE domain                             |
| PF13610 | DDE_Tnp_IS240   | DDE domain                                         |
| PF13612 | DDE_Tnp_1_3     | Transposase DDE domain                             |
| PF13613 | HTH_Tnp_4       | Helix-turn-helix of DDE superfamily endonuclease   |
| PF13700 | DUF4158         | Domain of unknown function (DUF4158)               |
| PF13701 | DDE_Tnp_1_4     | Transposase DDE domain group 1                     |
| PF13737 | DDE_Tnp_1_5     | Transposase DDE domain                             |

|         |                 |                                                             |
|---------|-----------------|-------------------------------------------------------------|
| PF13751 | DDE_Tnp_1_6     | Transposase DDE domain                                      |
| PF13808 | DDE_Tnp_1_assoc | DDE_Tnp_1-associated                                        |
| PF13952 | DUF4216         | Domain of unknown function (DUF4216)                        |
| PF13963 | Transpos_assoc  | Transposase-associated domain                               |
| PF14319 | Zn_Tnp_IS91     | Transposase zinc-binding domain                             |
| PF14372 | DUF4413         | Domain of unknown function (DUF4413)                        |
| PF14690 | zf-ISL3         | zinc-finger of transposase IS204/IS1001/IS1096/IS1165       |
| PF01695 | IstB_IS21       | IstB-like ATP binding protein                               |
| PF02992 | Transposase_21  | Transposase family tnp2                                     |
| PF02994 | Transposase_22  | L1 transposable element RBD-like domain                     |
| PF03017 | Transposase_23  | TNP1/EN/SPM transposase                                     |
| PF03184 | DDE_1           | DDE superfamily endonuclease                                |
| PF04195 | Transposase_28  | Putative gypsy type transposon                              |
| PF05717 | TnpB_IS66       | IS66 Orf2 like protein                                      |
| PF06782 | UPF0236         | Uncharacterised protein family (UPF0236)                    |
| PF12784 | PDDEXK_2        | PD-(D/E)XK nuclease family transposase                      |
| PF13022 | HTH_Tnp_1_2     | Helix-turn-helix of insertion element transposase           |
| PF13518 | HTH_28          | Helix-turn-helix domain                                     |
| PF13843 | DDE_Tnp_1_7     | Transposase IS4                                             |
| PF18758 | KDZ             | Kyakuja-Dileera-Zisupton transposase                        |
| PF10683 | DBD_Tnp_Hermes  | Hermes transposase DNA-binding domain                       |
| PF09322 | DUF1979         | Domain of unknown function (DUF1979)                        |
| PF10536 | PMD             | Plant mobile domain                                         |
| PF11426 | Tn7_TnsC_Int    | Tn7 transposition regulator TnsC                            |
| PF12851 | Tet_JBP         | Oxygenase domain of the 2OGFeDO superfamily                 |
| PF04236 | Transp_Tc5_C    | Tc5 transposase C-terminal domain                           |
| PF06465 | DUF1087         | Domain of Unknown Function (DUF1087)                        |
| PF06869 | DUF1258         | Protein of unknown function (DUF1258)                       |
| PF13017 | Maelstrom       | piRNA pathway germ-plasm component                          |
| PF18717 | CxC4            | CxC4 like cysteine cluster associated with KDZ transposases |

|         |         |                                                             |
|---------|---------|-------------------------------------------------------------|
| PF18718 | CxC5    | CxC5 like cysteine cluster associated with KDZ transposases |
| PF18721 | CxC6    | CxC6 like cysteine cluster associated with KDZ transposases |
| PF18759 | Plavaka | Plavaka transposase                                         |
| PF18802 | CxC1    | CxC1 like cysteine cluster associated with KDZ transposases |
| PF18803 | CxC2    | CxC2 like cysteine cluster associated with KDZ transposases |
| PF18804 | CxC3    | CxC3 like cysteine cluster associated with KDZ transposases |
| PF18866 | CxC7    | CxC7 like cysteine cluster associated with KDZ transposases |

## Supplementary Figures

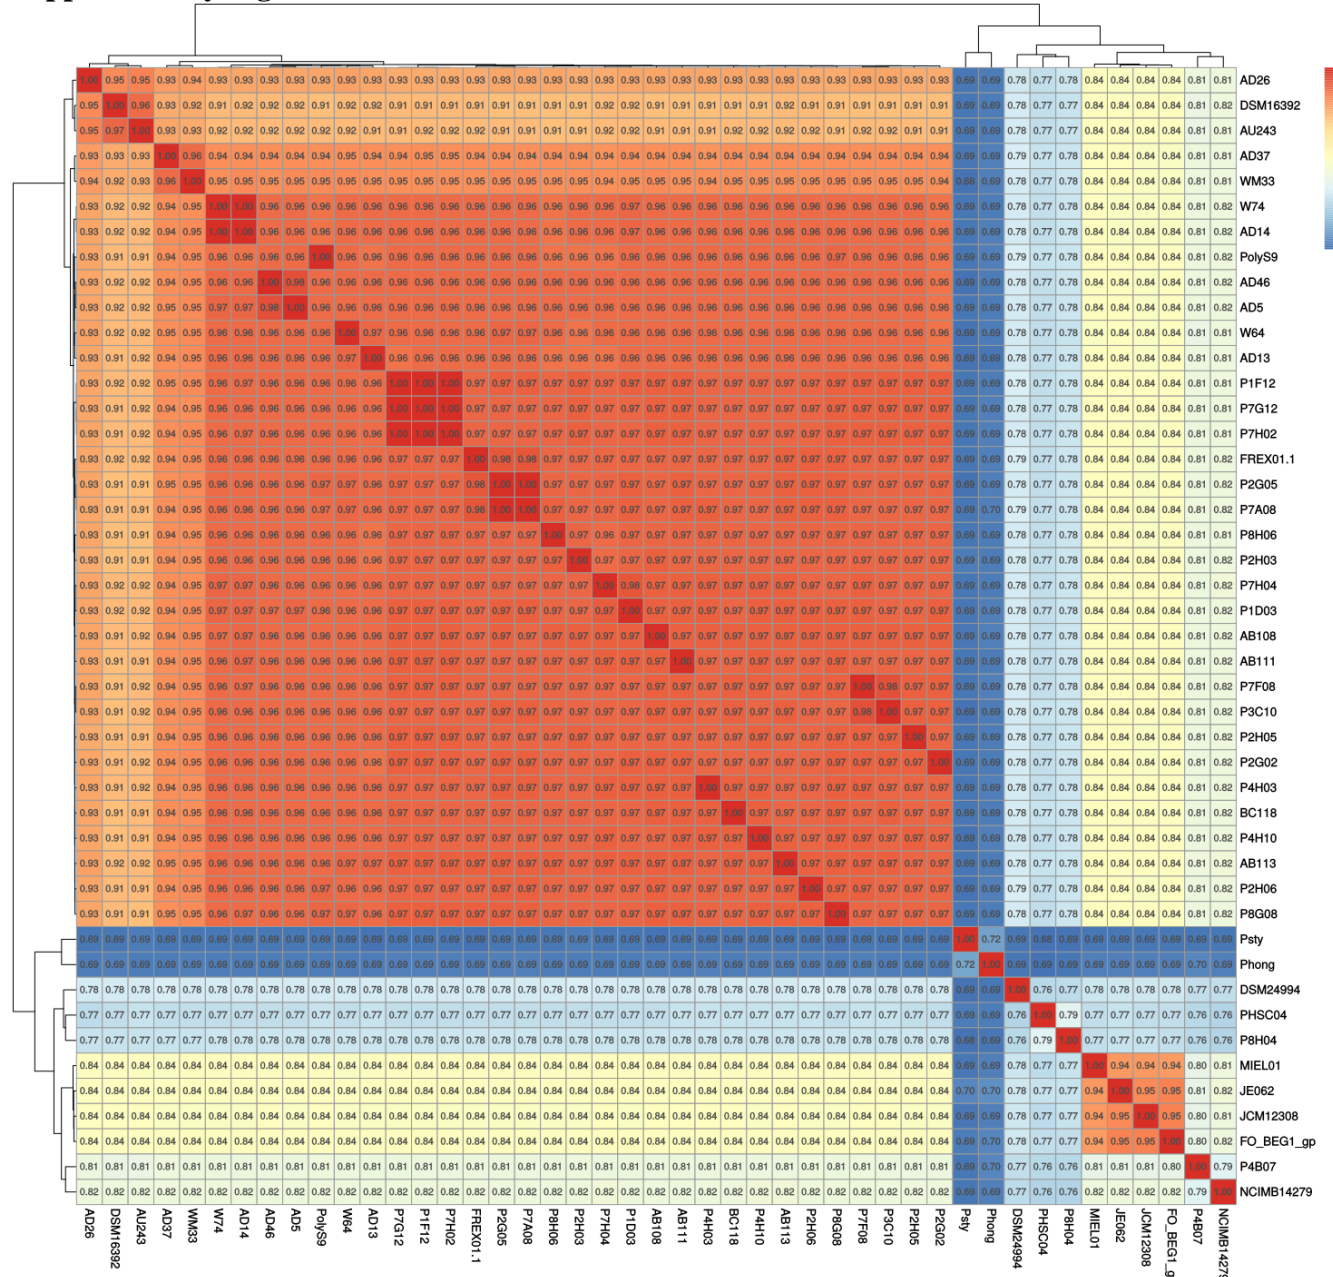

**Fig S1. Heat map of average nucleotide identity (ANI) values among 45 *Pseudovibrio* strains.** Percentages are given inside of squares. Type strains: DSM16392 = *Pseudovibrio ascidiaceicola*, DSM24994 = *Pseudovibrio axinellae*, JCM12308 = *Pseudovibrio denitrificans*, NCIMB14279 = *Pseudovibrio japonicus*, Psty = *Pseudovibrio stylochi*, Phong = *Pseudovibrio hongkongensis*.

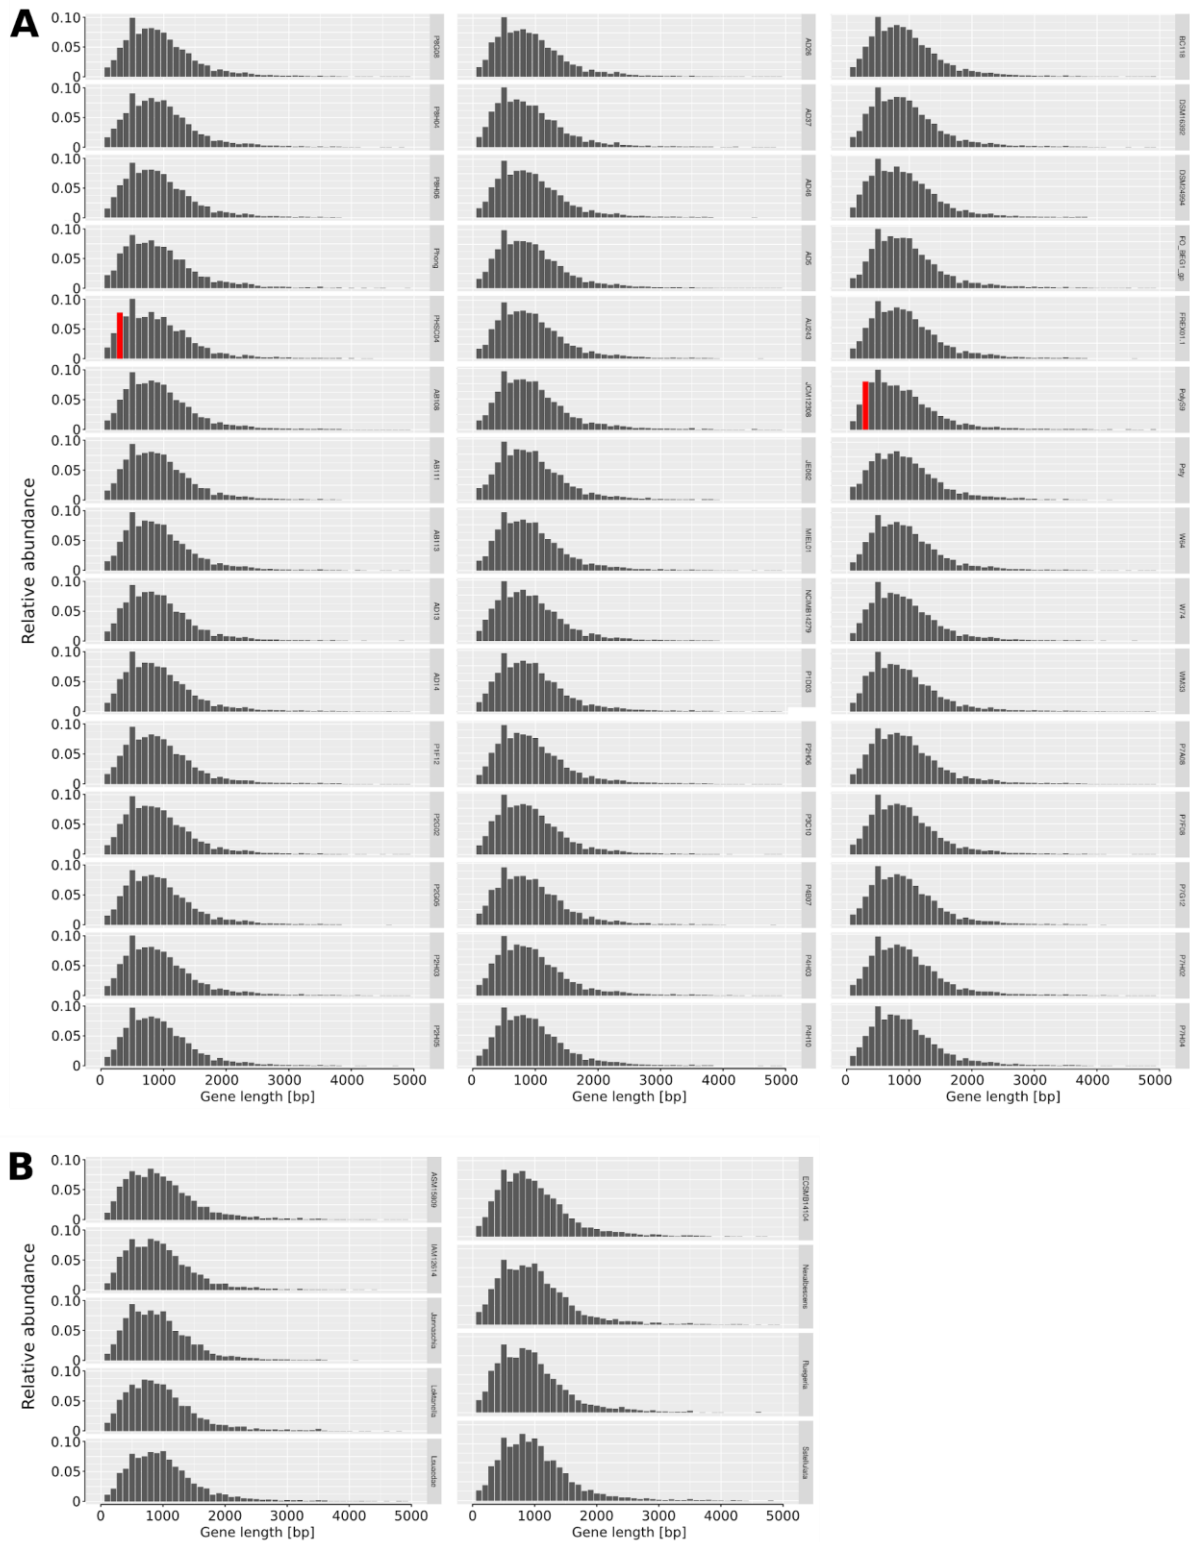

**Fig S2. Length distributions and relative abundances of protein coding genes in all *Pseudovibrio* (A) and selected outgroups (B) included in this study.** Gene length interval is 100 and the bar is indicating the maximum gene length. For example, all genes with a length between 0 and 100 bp are depicted in the first bar. Strains PolyS9 and PHSC04 had a proportionally higher amount,  $> 7.5\%$ , of short genes with lengths 200 – 300 bp (shown in red).



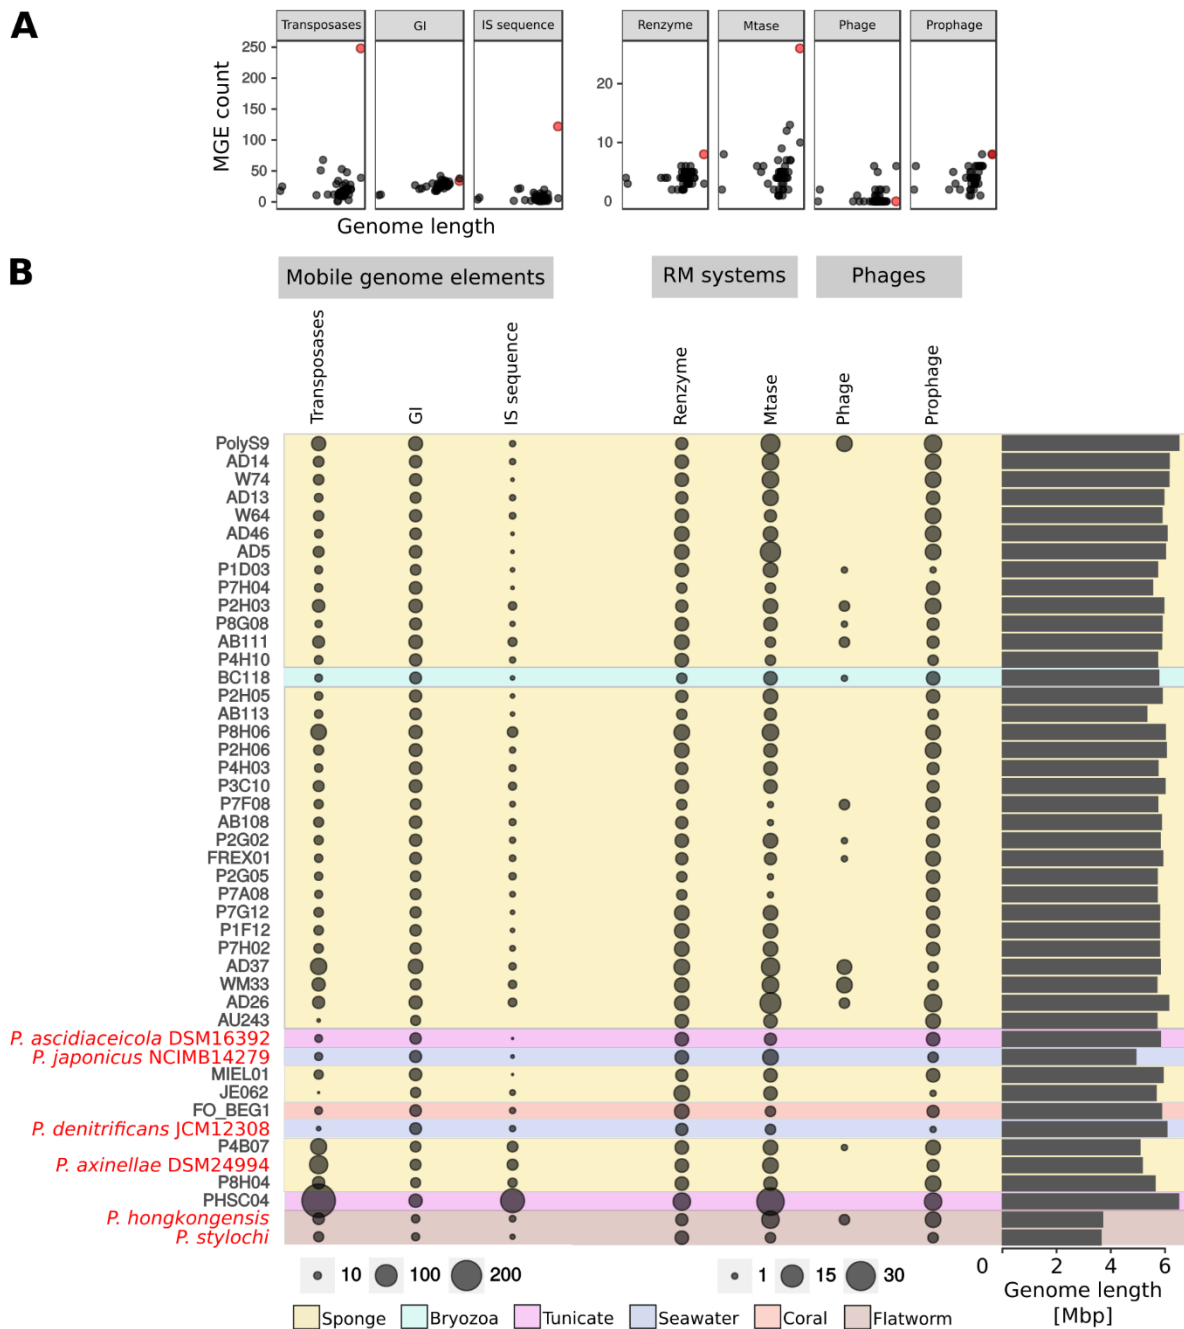

**Fig S3. Mobile genetic elements (MGE) of the *Pseudovibrio* genus.** Genomes were screened for transposases, genomic islands (GI), insertion sequences (IS), restriction enzyme (Renzyme) and methylase (Mtase) of restriction-modification systems, and phage contigs or prophages. The number of MGEs per genome were plotted against genome lengths (A). MGE counts for strain PHCS04 are colored in red. In B MGE counts are shown for all *Pseudovibrio* strains of this study (B). Colors correspond to isolation source.

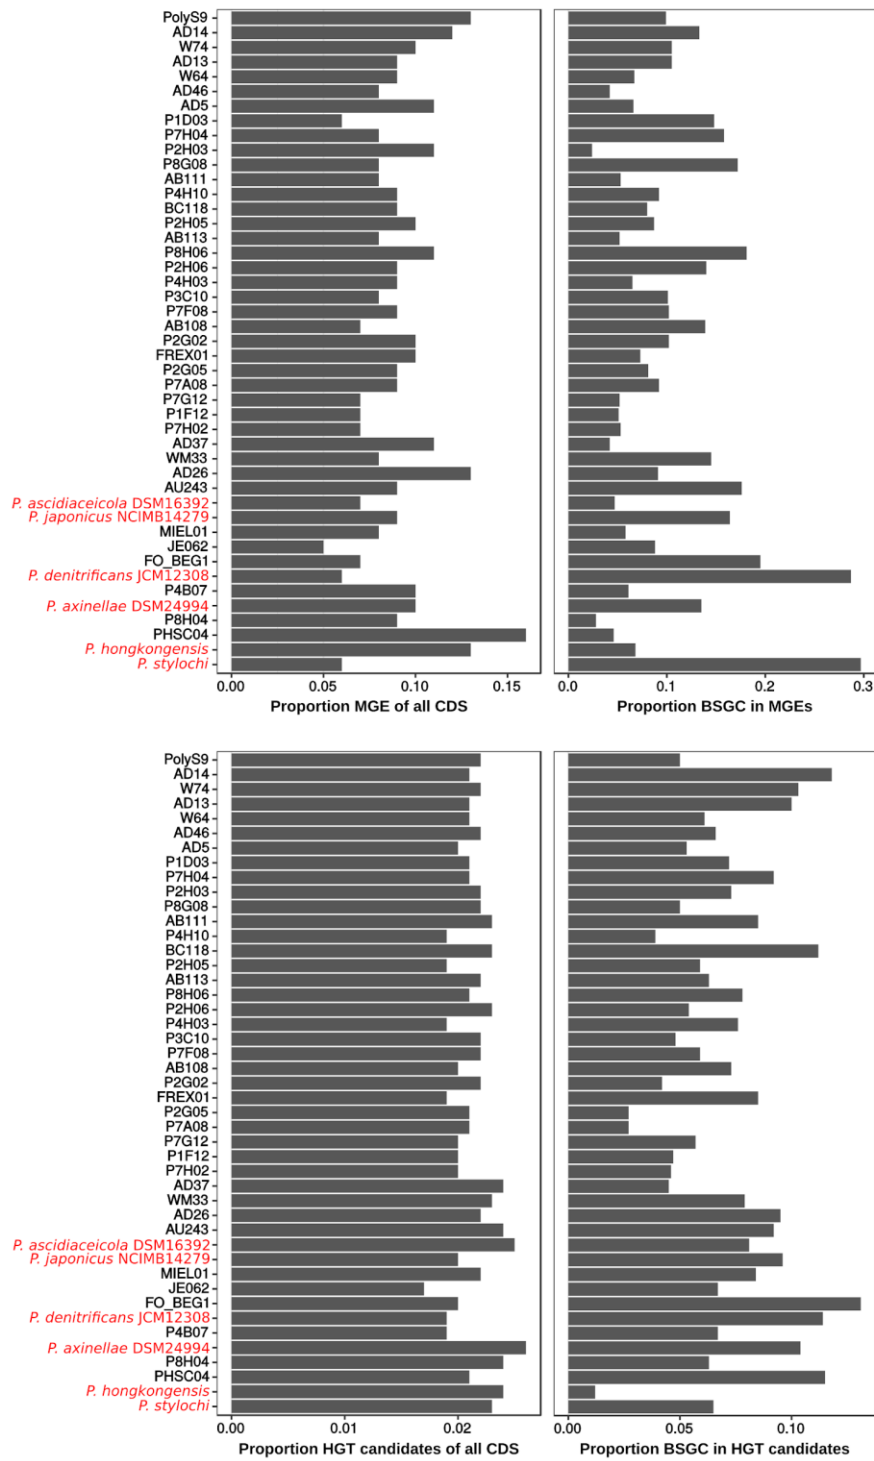

**Fig S4. Proportion of genes on mobile genetic elements (MGE) and horizontally acquired (HGT) gene candidates of all CDS and proportion of biosynthetic genes on MGEs or HGT candidates.**

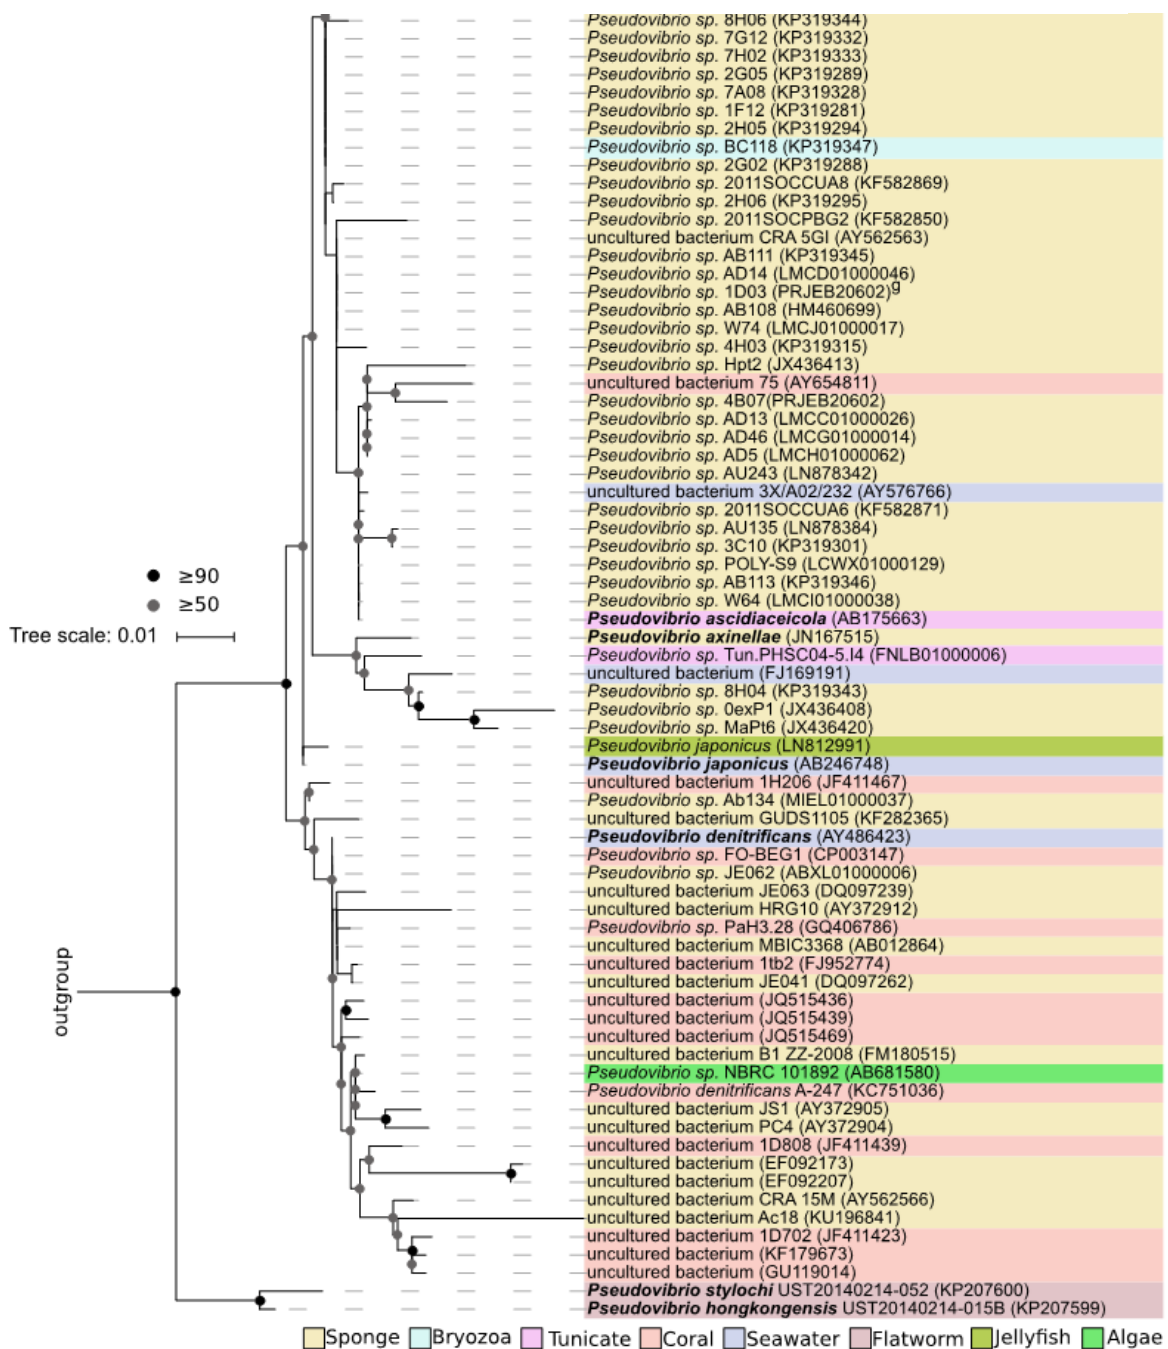

**Fig S5. 16S rRNA Maximum Likelihood tree of the genus *Pseudovibrio*.** Branch support values are derived using ultrafast bootstrap (UFBoot)<sup>1</sup> with 1000 replicates. Colors indicate isolation source.

<sup>1</sup>Hoang DT, Chernomor O, Von Haesler A, Minh BQ, Vinh LS. 2017. UFBoot2: improving the ultrafast bootstrap approximation. *Mol Biol Evol* 35(2):518–522

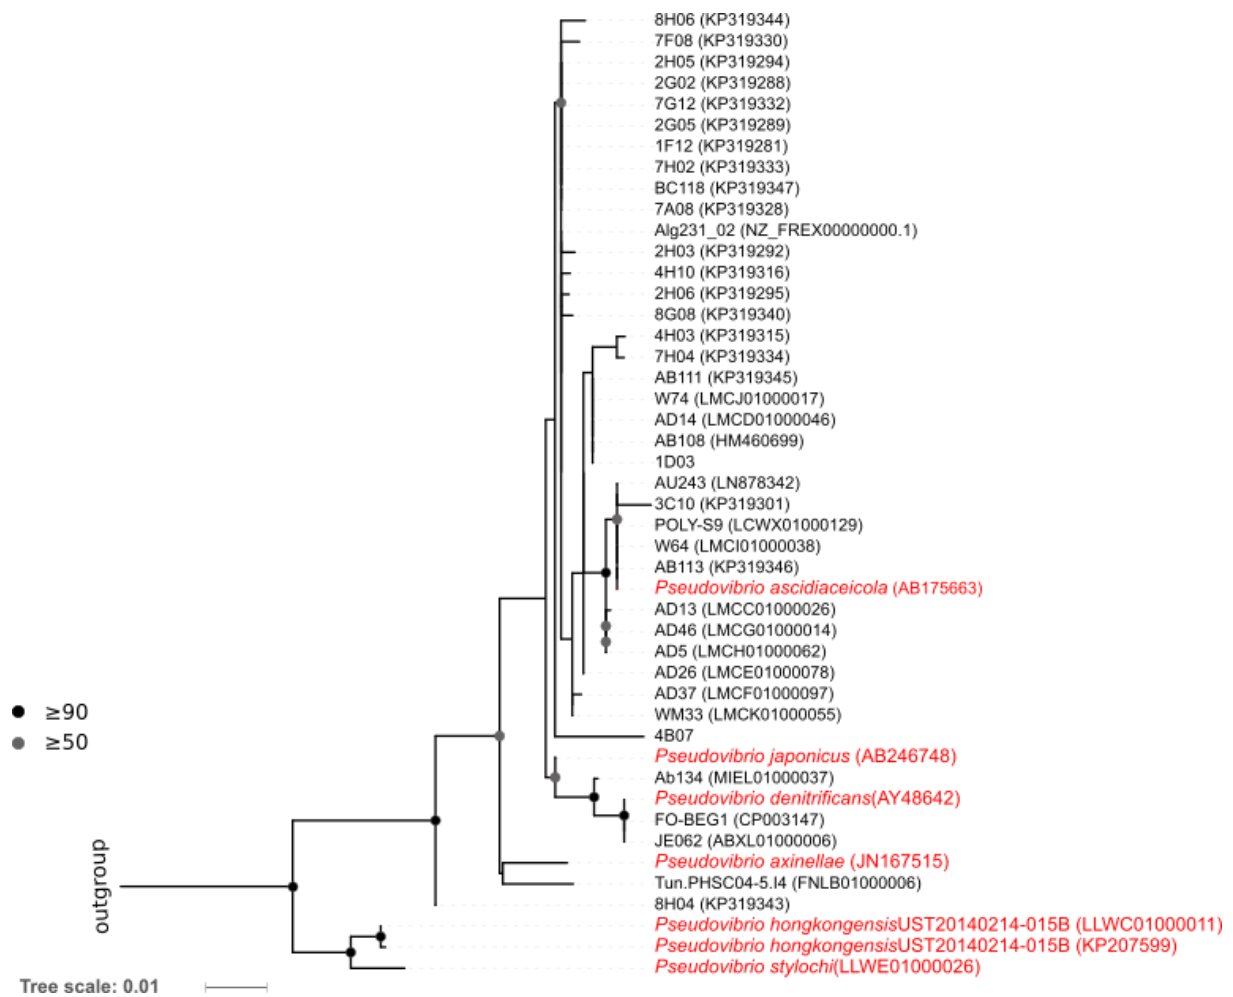

**Fig S6. 16S rRNA Maximum Likelihood tree of the *Pseudovibrio* strains included in the comparative genomic analyses (Fig 1).** Branch support values are derived using ultrafast bootstrap (UFBoot)<sup>1</sup> with 1000 replicates. Type strains are indicated in red.

<sup>1</sup>Hoang DT, Chernomor O, Von Haesler A, Minh BQ, Vinh LS. 2017. UFBoot2: improving the ultrafast bootstrap approximation. Mol Biol Evol 35(2):518–522
